1 **A trimeric autotransporter enhances biofilm cohesiveness in *Yersinia pseudotuberculosis***  
2 **but not in *Yersinia pestis***

3

4 Joshua T. Calder, Nicholas D. Christman, Jessica M. Hawkins, \*David L. Erickson

5

6 Department of Microbiology and Molecular Biology, Brigham Young University, Provo, UT,

7 United States

8

9 \*Corresponding author: David Erickson, Department of Microbiology and Molecular Biology,

10 Provo, UT, 84663 Tel: 801-422-1981 email: [david\\_erickson@byu.edu](mailto:david_erickson@byu.edu)

11

12 Running title: Trimeric autotransporter of *Yersinia pseudotuberculosis*

13 Keywords: *Yersinia pseudotuberculosis*, *Yersinia pestis*, biofilms, trimeric autotransporter, Rcs

14 phosphorelay

15 **ABSTRACT**

16 Cohesion of biofilms made by *Yersinia pestis* and *Yersinia pseudotuberculosis* (*Yptb*) has been  
17 attributed solely to an extracellular polysaccharide matrix encoded by the *hms* genes (Hms-  
18 ECM). However, mutations in the *Yptb* BarA/UvrY/CsrB regulatory cascade enhance biofilm  
19 stability without dramatically increasing Hms-ECM production. We found that treatment with  
20 proteinase K enzyme effectively destabilized *Yptb csrB* mutant biofilms, suggesting that cell-cell  
21 interactions might be mediated by protein adhesins or extracellular matrix proteins. We  
22 identified an uncharacterized trimeric autotransporter lipoprotein (YPTB2394), repressed by  
23 *csrB*, which has been referred to as YadE. Biofilms made by a  $\Delta yadE$  mutant strain were  
24 extremely sensitive to mechanical disruption. Overexpression of *yadE* in wild-type *Yptb*  
25 increased biofilm cohesion, similar to biofilms made by *csrB* or *uvrY* mutants. We found that the  
26 Rcs signaling cascade, which represses Hms-ECM production, activated expression of *yadE*. The  
27 *yadE* gene appears to be functional in *Yptb* but is a pseudogene in modern *Y. pestis* strains.  
28 Expression of functional *yadE* in *Y. pestis* KIM6+ altered the production of Hms-ECM and  
29 weakened biofilms made by these bacteria. This suggests that although the YadE autotransporter  
30 protein increases *Yptb* biofilm stability, it may be incompatible with Hms-ECM production that  
31 is essential for *Y. pestis* biofilm production in fleas. Inactivation of *yadE* in *Y. pestis* may be  
32 another instance of selective gene loss in the evolution of flea-borne transmission by this species.

33

34 **IMPORTANCE**

35 The evolution of *Yersinia pestis* from its *Y. pseudotuberculosis* (*Yptb*) ancestor involved gene  
36 acquisition and gene losses, leading to differences in biofilm production. Characterizing the  
37 unique biofilm features of both species may provide better understanding of how each adapts to  
38 its specific niches. This study identifies a trimeric autotransporter YadE that promotes biofilm  
39 stability of *Yptb* but which has been inactivated in *Y. pestis*, likely because it is not compatible  
40 with Hms polysaccharide that is crucial for biofilms inside fleas. We also reveal that the Rcs  
41 signaling cascade, which represses Hms expression in *Y. pestis*, activates YadE in *Yptb*. The  
42 ability of *Yptb* to use polysaccharide or YadE protein for cell-cell adhesion may help it produce  
43 biofilms in different environments.

## 44 INTRODUCTION

45 Environmental persistence, host interaction, and transmission of *Yersinia* depend on  
46 biofilms, which are tightly regulated by both transcriptional and post-transcriptional control  
47 mechanisms [1, 2]. Arguably, the best studied *Yersinia* biofilms are those made by *Y. pestis*  
48 while in the flea digestive tract that block the proventriculus and increase transmission to new  
49 hosts during flea feeding. These biofilms require the HmsHFERS proteins to produce and export a  
50 polysaccharide extracellular matrix of poly- $\beta$ -1,6-N-acetylglucosamine that is crucial in forming  
51 and maintaining bacterial cell-cell attachments [3, 4]. Without high levels of Hms-dependent  
52 extracellular matrix (Hms-ECM), the biofilms formed by *Y. pestis* while in fleas are not  
53 sufficiently cohesive to cause proventricular blockage. Adaptation to flea-borne transmission  
54 was precipitated in part by mutations that led to high levels of Hms-ECM compared to its *Y.*  
55 *pseudotuberculosis* (*Yptb*) ancestral lineage [5-7].

56 Among these mutations, modification of the Rcs regulatory system was especially  
57 important in enhancing Hms-ECM production. The Rcs signaling system includes the inner  
58 membrane kinase RcsC and the phosphorelay protein RcsD. RcsC phosphorylates itself when an  
59 inducing signal is present, and that phosphate is passed to RcsD and then to RcsB.  
60 Phosphorylated RcsB is a transcriptional regulator, binding to target promoters either as  
61 homodimers or as heterodimers with the auxiliary protein RcsA or other proteins [8]. Normally,  
62 the system is kept in the ‘off’ state by an inner membrane protein IgaA that blocks signaling  
63 through RcsD. When an appropriate activating signal is present, the RcsF lipoprotein sensor  
64 interacts with IgaA and relieves the inhibition [9]. RcsAB heterodimers negatively regulate  
65 *Yersinia* biofilms by binding to the promoters of the diguanylate cyclase genes *hmsT* and *hmsD*,  
66 as well as the *hmsHFERS* operon itself [10-12]. The *rcaA* gene is inactive in *Y. pestis* due to an

67 insertion in the open reading frame, and restoring the function of this gene prevents biofilm  
68 formation and flea blockage [13].

69 Like many bacteria, exopolysaccharide production is positively regulated in *Yersinia* by  
70 cyclic di-GMP made by diguanylate cyclases [14, 15]. When RcsAB repression of *hmsT* and  
71 *hmsD* transcription is eliminated, the resultant high levels of the second messenger enhance  
72 Hms-ECM production, likely by activating the HmsRS inner membrane proteins [11, 16, 17].  
73 Two phosphodiesterases that degrade cyclic-di-GMP are functional in *Yptb* but not in *Y. pestis*. A  
74 *Yptb* mutant strain wherein these genes (*rcaA* and both phosphodiesterases) are replaced with *Y.*  
75 *pestis* non-functional alleles can block fleas, but not to the same extent as *Y. pestis* [5]. This  
76 indicates that additional biofilm-related differences exist between the two species.

77 Several other regulatory influences on biofilm production in both *Yptb* and *Y. pestis* have  
78 been identified. We recently reported that the BarA/UvrY two-component system represses  
79 biofilms in *Yptb* by activating the CsrB small RNA [18]. Although *Yptb* mutants lacking *csrB* or  
80 *uvrY* make more cohesive biofilms than the wild type strain, their production of Hms-ECM does  
81 not approach that of *Y. pestis*. This suggested that *Yptb* biofilms may contain additional  
82 extracellular matrix components that are responsible for their cohesion. In this study, we  
83 investigated the basis for the increased cohesiveness of *csrB* mutant biofilms in an effort to  
84 identify novel *Yptb*-specific biofilm features. We found that *Yptb* biofilms have a significant  
85 protein component not present in *Y. pestis*. We focused on the uncharacterized YPTB2394  
86 protein (YadE) which is repressed by *csrB*. This predicted lipoprotein is a part of the trimeric  
87 autotransporter family of proteins that function in bacterial adhesion to host surfaces or bacterial  
88 cell-cell attachments in biofilms [19-21]. Here, we show that production of YadE leads to *Yptb*  
89 biofilms that strongly resist disruption. Expression of *yadE* is activated by the Rcs system, in

90 contrast to repression of Hms-ECM by RcsAB. Conversely, *yadE* is a pseudogene in *Y. pestis*  
91 and we demonstrate that *yadE* expression alters the production of Hms-ECM and weakens *Y.*  
92 *pestis* biofilms.

93

## 94 **RESULTS**

### 95 ***Yptb* biofilm cohesion requires proteins**

96 We previously demonstrated that mutations in the BarA/UvrY two-component regulatory  
97 system, or in the CsrB small RNA activated by UvrY, increase cohesion of *Yptb* strain IP32953  
98 biofilms [18]. In that study, lectin staining of the *csrB* mutant strain indicated only moderately  
99 increased Hms-ECM on the surface of these bacteria. This suggested the possibility of additional  
100 structural components that are increased in the *csrB* mutant strain which assist in holding *Yptb*  
101 biofilms together. Protein adhesins and extracellular DNA are present in the biofilm extracellular  
102 matrices of numerous other bacteria. We therefore treated wild type and *csrB* mutant *Yptb*  
103 biofilms with DNase or proteinase K enzymes prior to testing their dispersal in mechanical  
104 disruption assays (Fig. 1). As expected, the *csrB* mutant formed more cohesive biofilms than the  
105 wild type strain. DNase did not significantly increase disruption of either wild type or *csrB*  
106 mutant biofilms compared with the control saline treatment. In contrast, proteinase K markedly  
107 increased the proportion of the *csrB* mutant strain biofilms that were dispersed. *Y. pestis* biofilms  
108 were very stable in these assays and were not affected by proteinase K or DNase treatment.

### 109 **YPTB2394 putative autotransporter expression confers biofilm cohesion**

110 Since we had demonstrated that *Yptb csrB* mutant biofilms are likely more cohesive in  
111 part due to a protein component of the extracellular matrix, we searched for proteins that were  
112 expressed more abundantly in the *csrB* mutant strain. We had previously conducted a

113 comparison of the wild type and *csrB* mutant proteomes and found a large number of proteins  
114 that were expressed at lower levels in the *csrB* mutant, which is consistent with the role of CsrA  
115 as a translational repressor [15]. YPTB2394 was among the few proteins that were expressed  
116 more abundantly (approximately 30-fold higher) by the *csrB* mutant. YPTB2394 is annotated as  
117 a predicted lipoprotein with homology to type Vc autotransporter proteins. Trimeric  
118 autotransporter adhesins are membrane-anchored proteins known to mediate cell-cell  
119 attachments in other Gram-negative bacteria and promote greatly enhanced biofilm production in  
120 diverse species [22-24]. YPTB2394 is predicted to have a C-terminal YadA-like anchor, and  
121 several YadA-like stalk domains. The orthologous gene in *Y. pseudotuberculosis* strain YPIII  
122 (YPK\_0761) has been referred to as *yadE* [25], although its function has not been investigated.

123 To examine the role of *yadE* in biofilm cohesion, we first deleted the gene from the wild  
124 type *Yptb* IP32953 strain. Biofilms formed by the mutant strain were extremely fragile compared  
125 to the wild type strain (Fig. 2). We then complemented the mutant strain by inserting *yadE* on a  
126 low-copy plasmid with a constitutive promoter. This resulted in biofilms that were highly  
127 resistant to disruption, even more so than *csrB*::Tn5 mutant biofilms. This strongly suggests that  
128 YadE helps maintain intracellular contacts and promotes *Yptb* biofilm cohesion.

### 129 ***yadE* gene expression is regulated by CsrB and by the Rcs regulatory cascade**

130 YadE (YPTB2394) protein levels are approximately 30-fold greater in *csrB* mutant  
131 bacteria compared to wild-type cells [18]. CsrB is a regulatory RNA that sequesters CsrA protein  
132 [26, 27]. Typically, CsrA binds to target sequences found near the Shine-Delgarno region of  
133 target transcripts and represses their translation. CsrB accumulation frees mRNA targets of CsrA  
134 to be translated more efficiently. However, translation of some CsrA-regulated proteins is  
135 enhanced by CsrA binding, and it is possible that CsrA is a direct translational activator of YadE.

136 Alternatively, CsrA could repress translation of another transcriptional regulator, making its  
137 effect on *yadE* expression indirect. To further investigate regulation of *yadE*, we created a  
138 reporter plasmid containing the 356 bp region upstream of the start codon fused to a  
139 promoterless green fluorescent protein (*gfp*) gene. Transformation of wild type cells with this  
140 plasmid resulted in low but detectable levels of fluorescence. Expression was significantly  
141 enhanced in *csrB*::Tn5 mutant bacteria (Fig. 3), confirming the negative effect on YadE  
142 expression by CsrB.

143 In order to identify possible transcriptional repressors of *yadE*, we created a transposon  
144 mutant library in a wild type IP32953 strain carrying the *yadE*::*gfp* reporter plasmid. We then  
145 used fluorescence activated cell sorting to enrich for mutants with higher fluorescence than the  
146 wild type strain. After sorting, we verified enhanced *yadE*::*gfp* activity in isolated single  
147 colonies of 48 mutants by flow cytometry and determined their transposon insertion sites. We  
148 determined 23 distinct insertion sites among these mutants (Supplementary Table 1). We  
149 obtained 9 separate transposon mutants with insertions in the *igaA* gene, encoding the  
150 periplasmic IgaA protein that prevents overactivation of the Rcs signaling cascade [8]. We also  
151 obtained multiple mutants with insertions in genes encoding adenylate cyclase (*cya*) and the  
152 stringent starvation protein (*sspA*). We tested biofilms made by *cya*, *sspA*, and *igaA* transposon  
153 mutants and found that they were also more cohesive than the wild type strain (Fig. 4),  
154 correlating with increased expression of *yadE*.

155 IgaA limits the phosphorylation of RcsC and thereby prevents activation of RcsB. In  
156 some Enterobacteriaceae, *igaA* is an essential gene as overactivation of the Rcs cascade is lethal  
157 [28, 29]. In contrast, *Y. pestis* mutants with transposon insertions in *igaA* have been reported [30,  
158 31] and our results confirm that this gene is also not essential in *Yptb* despite its fully functioning



159 Rcs cascade. We verified that plasmid complementation of the *igaA* mutation could restore lower  
160 *yadE* expression similar to the wild type strain (Fig. 5). To confirm that overactive Rcs signaling  
161 was responsible for the enhanced *yadE* expression in *igaA* mutants, we compared *yadE* promoter  
162 activity in an *rcsB*::Tn5 mutant background, and in bacteria overexpressing *rcsB* via a multicopy  
163 plasmid. Lack of *rcsB* did not measurably decrease *yadE* expression compared to the wild type  
164 strain, but overexpression resulted in much higher fluorescence, similar to the *igaA* mutant (Fig.  
165 5). These results indicate that the Rcs signaling cascade positively regulates *yadE* expression,  
166 opposite to Rcs repression of Hms-ECM production [11].

### 167 ***yadE* is a pseudogene in *Y. pestis*, and expression of functional *yadE* prevents Hms-ECM** 168 **production**

169 Selective gene loss in *Y. pestis* during its divergence from *Yptb* has contributed to the  
170 emergence of flea-borne transmission [5, 6, 13, 32]. All publicly available genome sequences  
171 contain a *yadE* gene fragment that is identical among *Y. pestis* strains. Pairwise alignment shows  
172 four small deletions in the N-terminal region of the *Y. pestis* sequences relative to the *Yptb*  
173 IP32953 *yadE*. These are predicted to maintain the reading frame with 98.5% amino acid identity  
174 across the first 706 residues. However, a single insertion in a poly-G tract starting at nucleotide  
175 2118 alters the reading frame of the *Y. pestis* sequence and results in five premature stop codons  
176 (Fig. 6). These are predicted to result in a non-functional protein missing the C-terminal YadA-  
177 like membrane anchoring domain. To investigate the possible consequences of *yadE* loss on *Y.*  
178 *pestis* biofilm stability, we transformed *Y. pestis* KIM6+ with the same plasmid conferring  
179 constitutive expression of the functional *yadE* gene. In contrast to its effect on *Yptb*, expression  
180 of *yadE* in *Y. pestis* resulted in biofilms that were more easily disrupted (Fig. 7a). This strain also  
181 produced colonies that were less pigmented on Congo-red agar plates, which is suggestive of

182 reduced Hms-ECM production (Fig. 7b). We also tested the production of Hms-ECM using  
183 lectin staining and flow cytometry. Wild type *Y. pestis* binds strongly to wheat-germ agglutinin  
184 specific for N-acetylglucosamine polysaccharides. Conversely, *Y. pestis* expressing *yadE*  
185 exhibited a bipolar WGA-lectin staining pattern, where a significant portion of the cells did not  
186 bind to the lectin while another population bound at higher levels than the wild type strain (Fig.  
187 7c). Thus, expression of functional *yadE* from *Yptb* in *Y. pestis* weakens biofilm cohesiveness,  
188 perhaps by altering production of the Hms-ECM.

189

## 190 **DISCUSSION**

191 Biofilms may be held together by extracellular polysaccharides, DNA, or proteins.  
192 Among *Yptb* strains, carriage of the *hms* genes encoding for polysaccharide extracellular matrix  
193 is ubiquitous, although they vary greatly in their expression of these genes [33]. The Hms-ECM  
194 is required for *Yptb* biofilm production in some conditions, including on the mouthparts of  
195 predatory nematodes [34, 35]. Extracellular DNA has also been detected in at least some *Yptb*  
196 nematode-associated biofilms, although the source and functional significance of the DNA  
197 remain unclear [36]. The extracellular matrix of biofilms formed by *Y. pestis* while they are in  
198 the flea digestive tract incorporates material derived from blood digestion [4], but the bacteria  
199 are not known to produce any other biofilm extracellular matrix material other than Hms-ECM.  
200 Our study is the first to demonstrate a role for a protein in mediating cohesion of *Yersinia*  
201 biofilms. The YPTB2394 (*yadE*) gene encodes a trimeric autotransporter protein vital to the  
202 stability of *Yptb* biofilms, as its inactivation results in a fragile biofilm and its overexpression  
203 significantly strengthens cohesiveness.

204 Multiple autotransporter proteins belonging to either type Va, Vc, or Ve families are  
205 present in *Y. pestis* and/or *Yptb* [37]. Type Va *Yersinia* autotransporters have been mainly  
206 investigated in the context of *Y. pestis* infection. YapE, YapJ, YapK, and YapV promote  
207 development of bubonic and/or pneumonic plague in mice [38-40], likely by enhancing  
208 adherence to epithelial cells. YapC can induce aggregation when expressed in *E. coli* but no  
209 effects on *Y. pestis* biofilms following deletion of this gene were observed [41]. *Yptb* strains also  
210 possess an additional type Va autotransporter gene *yapX*, whose function is unknown, which is  
211 also a pseudogene in all *Y. pestis* strains [38].

212 YadE is predicted to be a member of the type Vc trimeric autotransporter family.  
213 Numerous species use trimeric autotransporters to adhere to other bacteria within biofilms, host  
214 extracellular matrix proteins, or inanimate surfaces [21]. The prototype of the Vc family is  
215 YadA, made by *Yptb* and *Y. enterocolitica* but which has been inactivated in *Y. pestis*. YadA  
216 promotes autoagglutination and tight adherence to eukaryotic cells necessary for proper injection  
217 of effector proteins via type III secretion [42]. Restoring *yadA* gene function in *Y. pestis* has been  
218 reported to decrease its virulence in mouse infections [43]. It is not known whether YadA  
219 expression also interferes with Hms-ECM production by *Y. pestis*. However, it is co-expressed  
220 along with the type III secretion effectors encoded on the virulence plasmid at 37°C rather than  
221 at lower temperatures when Hms-ECM is produced. *Yptb* and *Y. pestis* both express two  
222 additional type Vc proteins, YadB and YadC, also at 37°C, which promote invasion of host cells  
223 and bacterial survival in skin [44].

224 Versatile biofilm production strategies are probably most helpful to bacteria such as *Yptb*  
225 that are found in many different environments (free-living or within amoeba in soil or water, in  
226 plants, or in the digestive tracts of multiple animals) [45]. Conversely, niche specialization might

227 be promoted by the selection of one biofilm pathway at the expense of others. Many  
228 *Staphylococcus* strains produce biofilms that are dependent on polysaccharide intracellular  
229 adhesin, which is identical to Hms-ECM [46]. However, expression of this polymer tends to be  
230 suppressed in methicillin-resistant *S. aureus* strains in favor of fibronectin binding proteins [47].  
231 Staphylococci that predominantly inhabit environments with high shear stress or grow on  
232 medical devices produce primarily polysaccharide-dependent biofilms [48, 49], whereas those  
233 that interact more directly with host tissues may benefit from protein-based biofilms that allow  
234 them to incorporate fibrin or other host proteins into a protective shield [50]. It is tempting to  
235 speculate that *Yptb* strains retain multiple biofilm strategies that provide flexibility according to  
236 changing environments, whereas *Y. pestis* may have jettisoned alternative biofilm strategies to  
237 Hms-ECM as it adapted to its restricted lifestyle of flea-rodent transmission.

238         Although *yadE* (y1486 in the *Y. pestis* KIM sequence) is a pseudogene in *Y. pestis*, it is  
239 one of the 100 most highly transcribed genes by this strain during infection of fleas [51].  
240 Furthermore, even greater expression was measured in a *Yptb* mutant strain that is able to infect  
241 and block fleas [52]. Thus, the regulatory influences necessary for strong induction of this gene  
242 exist during flea infections. We found that Tn5 insertions in the adenylate cyclase responsible for  
243 producing cyclic AMP greatly enhance *yadE* expression. This is consistent with previously  
244 reported transcriptome comparisons of a cAMP receptor protein (CRP) mutant to the wild type  
245 YPIII strain [25]. Our results also demonstrate that induction of Rcs signaling, either due to  
246 inactivation of *igaA* or overexpression of *rcsB*, dramatically increases expression of *yadE*. The  
247 Rcs cascade is very complex and can respond to many different signals, including  
248 lipopolysaccharide and peptidoglycan perturbations [53, 54]. Innate immune defenses, osmotic  
249 changes, or other factors present in the flea digestive tract may inflict similar stresses to *Yersinia*.

250 At the same time, high levels of *yadE* expression are disruptive to production, accumulation, or  
251 stability of the Hms-ECM. Hms-ECM is essential for proper biofilm formation and  
252 proventricular blockage, the major transmission mode of *Y. pestis* by rat fleas. Therefore, loss of  
253 *yadE* gene function may have been an additional key step in the divergence of *Y. pestis* from  
254 *Yptb*.

255

## 256 **EXPERIMENTAL PROCEDURES**

### 257 **Bacterial strains, media and growth conditions**

258 *Y. pestis* KIM6+ and *Y. pseudotuberculosis* IP32953 were grown at 21°C in Luria-Bertani  
259 (LB) or heart infusion broth containing 0.2% galactose (HIG) [18]. *E. coli* strains were grown in  
260 LB agar or broth at 37°C. Where required, kanamycin (30 µg/ml), chloramphenicol (10 µg/ml),  
261 or ampicillin (100 µg/ml) were added to media.

262 Deletion of *yadE* from *Yptb* IP32953 was accomplished through allelic exchange. The  
263 PCR primers used for creating the strains and plasmids for these experiments are listed in  
264 Supplementary Table S2. Upstream and downstream regions adjacent to YPTB2394 were cloned  
265 by overlapping extension PCR [55] and inserted into plasmid pRE112 [56] to create pREΔ*yadE*.  
266 The ampicillin resistance (*bla*) gene from pHSG415 [57] was then inserted into this plasmid  
267 replacing the *yadE* coding region to create pREΔ*yadE*::*bla*. After biparental mating with *E. coli*  
268 strain MFDλpir (pREΔ*yadE*::*bla*) [58] as donor and *Yptb* IP32953 as recipient, double-crossover  
269 mutations were selected on media containing 10% sucrose and ampicillin. The mutation was  
270 verified using PCR and Sanger sequencing (Eton Biosciences Inc.).

271 To overexpress *yadE*, the YPTB2394 gene as well as the upstream 200 bp region were  
272 placed under the control of the tetracycline resistance promoter on plasmid pACYC184. PCR

273 products for the *yadE* gene and the pACYC184 backbone were combined in an overlapping-  
274 extension PCR reaction and transformed into *E. coli* DH5 $\alpha$  to create plasmid pACYC-*yadE*. In a  
275 similar way, the pACYC-*yadE*::*gfp* reporter plasmid was created by amplifying the *gfp* coding  
276 region from pUC18R6K-miniTn7T sig70c35\_GFP [59], the YPTB2394 promoter region, and the  
277 pACYC184 backbone. These PCR products were purified and combined in an overlapping-  
278 extension PCR reaction and transformed into *E. coli* DH5 $\alpha$ . Plasmids containing *igaA* and *rcsB*  
279 (pJET-*igaA* and pJET-*rcsB*) were created by PCR amplification of the respective genes and  
280 cloning into the pJET1.2 plasmid (ThermoFisher). All plasmids were sequence verified and  
281 transformed into *Yersinia* strains by electroporation.

## 282 **Biofilm disruption assay**

283 Biofilm stability was measured as previously described [18]. Overnight broth cultures of  
284 strains to be tested were transferred to polycarbonate track etched (PCTE) membrane filters  
285 (n=4-5) on HIG agar plates. After 72h of growth at 21°C, individual filters containing the biofilm  
286 samples were placed in 10 mL of phosphate buffered saline (PBS). Tubes were shaken vertically  
287 at 200 rpm and the optical density of dislodged cells was measured ( $A_{600nm}$ ) at specific time  
288 points. The filters were then vortexed at high speed until biofilms were completely disrupted and  
289 the  $A_{600nm}$  measured. Enzymatic treatment of biofilms prior to disruption tests were performed  
290 with proteinase K (Sigma) or DNase (Ambion) at 5 mg/ml. Solutions of enzyme in PBS (100  $\mu$ l)  
291 were placed directly on top of the biofilms and incubated at 21°C for 60 minutes.

## 292 **Transposon mutagenesis and fluorescence activated cell sorting**

293 A Tn5 transposon mutant library in strain IP32953 (pACYC-*yadE*::*gfp*) was created  
294 using the pRL27 donor plasmid as previously described [60]. After plating the mating mixture on  
295 HIB agar containing kanamycin and chloramphenicol, ~100,000 individual mutant colonies were

296 suspended and washed in PBS and diluted to  $10^6$  cfu/ml for FACS sorting. A total of  $\sim 4 \times 10^6$   
297 individual *Yptb* mutant bacteria were sorted using FACS Aria Fusion Cell Sorter (BD  
298 Biosciences) at the BYU Cell Sorting/Bio-Mass Spectrometry core facility. Cells exhibiting one  
299 standard deviation greater than the wild-type IP32953 strain in the GFP channel were collected,  
300 diluted and plated on HIB agar containing kanamycin and chloramphenicol to grow single  
301 colonies. The plates were then incubated for 24 h. Approximately 1000 colonies from these  
302 plates were examined individually using an LED mini-blue transilluminator (IO Rodeo). From  
303 this pool, 48 colonies were confirmed visually to express high levels of GFP after re-growth and  
304 were selected for further verification using flow cytometry. The Tn5 insertion sites in these  
305 mutants were determined by arbitrary PCR and sequencing as previously described [58]. Of the  
306 48 colonies, 23 were found to have unique insertion sites as reported in Supplementary Table 1.

### 307 **Flow cytometry**

308 To measure *yadE::gfp* expression, bacteria containing the reporter plasmid were grown  
309 on HIG agar plates at 21°C for 24 h. For each strain, bacteria from individual colonies were  
310 suspended in PBS and the GFP fluorescence measured by flow cytometry. For Hms-ECM  
311 measurement on the surface of bacteria, fixed bacterial cells were incubated with FITC-labeled  
312 wheat-germ agglutinin (Sigma) as previously described [18]. GFP expression and lectin binding  
313 of individual cells was measured using a BD Accuri C6 Flow Cytometer and analysed using  
314 FACSDiva software (BD Biosciences).

### 315 **Statistical analysis**

316 Statistical analysis was performed using Graphpad Prism 6.0. The details for each test are  
317 provided in the relevant figure legend.

318

319 **ACKNOWLEDGEMENTS**

320 We thank Daniel Call for technical assistance with cell sorting. JTC was funded through a BYU  
321 CURA grant.

322

323 **FIGURE LEGENDS**

324 **Figure 1. Increased stability of *Yptb csrB::Tn5* mutant biofilms may be mediated by**  
325 **proteins.** Biofilms were grown on polycarbonate filters for 72 hours. Filter biofilms were then  
326 treated with proteinase K or DNase for 30 minutes prior to agitation for 15 minutes. The  
327 proportion of the biofilms that were dislodged was measured by spectrophotometry. Pre-  
328 treatment of *Yptb csrB::Tn5* mutant biofilms with proteinase K enhances their dispersal relative  
329 to the PBS control (\*\*\*\* $p < 0.001$  by Student's T test) while DNase had no effect. *Y. pestis*  
330 biofilm stability was not affected by pretreatment with either enzyme.

331

332 **Figure 2. YPTB2394 (*yadE*) affects biofilm cohesion.** Biofilms formed by the wild type  
333 IP32953, YPTB2394 ( $\Delta yadE$ ) mutant, and strain overexpressing *yadE* were each agitated and  
334 their dispersal measured at 5-minute intervals. Results were analyzed using repeated measures  
335 ANOVA with Tukey's multiple comparison test (\*\*\*\*significantly different from wild type,  
336  $p < 0.0001$ ).

337

338 **Figure 3. Expression of *yadE* is repressed by CsrB.** The *Yptb* IP32953 wild type and  
339 *csrB::Tn5* mutant strains were transformed with a *yadE::gfp* reporter plasmid. After growth for  
340 48h on solid media the fluorescence of the population was measured by flow cytometry. \*\*\*  
341 indicates a significant difference from the wild-type strain ( $p = 0.0002$ ) by unpaired T-test.



342 **Figure 4. Mutants that overexpress *yadE* produce more cohesive biofilms.** Transposon  
343 mutants derived from IP32953 with high *yadE::gfp* reporter activity were selected by FACS.  
344 Individual mutants with insertions in *igaA*, *sspA*, and *cya* genes were tested in biofilm disruption  
345 assays in comparison with the wild type IP32953 strain and the wild type strain overexpressing  
346 *yadE* (pACYC-*yadE*). One-way ANOVA analysis was performed with Tukey's correction for  
347 multiple comparisons. Columns with the same letter (a, b, c) are not significantly different from  
348 each other (95% confidence interval).

349

350 **Figure 5. Expression of *yadE* is controlled by the Rcs phosphorelay.** Inactivation of *igaA* or  
351 overexpression of *rscB* increased *yadE::gfp* reporter activity. Fluorescence was measured by  
352 flow cytometry and compared with the wild type strain (\*\* indicates a significant difference by  
353 unpaired T test,  $p < 0.01$ ).

354

355 **Figure 6. The YPTB2394 and y1486 orthologues of *Yptb* and *Y. pestis*.** Domains predicted in  
356 the YPTB2394 protein sequence typical of trimeric autotransporters [61] include a  
357 transmembrane helix containing a secretion signal peptide (30-51), a HANS domain that  
358 typically connects  $\alpha$ -to- $\beta$  regions of proximal to head regions, COG5295 comprising the  $\beta$ -strand  
359 head domains with repetitive motifs, and the YadA-like anchor consisting of a 12-stranded outer  
360 membrane  $\beta$ -barrel. The asterisk notes the region containing the premature stop codons found in  
361 the *Y. pestis* sequences. Pairwise alignment of the *Yptb* IP32953 *yadE* (YPTB2394) and *Y. pestis*  
362 KIM pseudogene (y1486) nucleotide sequences shows that the sequences are highly similar  
363 across the 2643 bp *Yptb* sequence. All *Y. pestis* sequences have 14, 7, 4, and 5 bp deletions  
364 between nucleotides 185-209 and 326-340, which maintain the reading frame (not shown). A

365 guanine insertion at nucleotide 2118 changes the reading frame and results in 5 predicted stop  
366 codons in the C-terminal region beginning at nucleotide 2230 that are predicted to eliminate the  
367 C-terminal YadA-like anchor.

368

369 **Figure 7. Expression of functional *yadE* in *Y. pestis* reduces biofilm stability and alters**

370 **Hms-ECM production.** A. Disruption of biofilms formed by *Y. pestis* KIM6+ wild type or  
371 strains transformed with pACYC-*yadE* or the pACYC184 empty vector. Results were analyzed  
372 using repeated measures ANOVA with Tukey's multiple comparison test (\*\* $p < 0.01$ ,  
373 \*\*\* $p < 0.001$ , \*\*\*\* $p < 0.0001$ ) B. Pigmentation of *Y. pestis* (*yadE*+ or empty vector) grown on  
374 Congo-red agar plates. C. Flow cytometry analysis of *Y. pestis* stained with GFP-labeled WGA  
375 lectin that binds to HMS-ECM. The wild type strain (orange) is uniformly labeled compared to  
376 the unstained control (red) while the strain expressing functional *yadE* (blue) exhibits a bipolar  
377 staining pattern with either no detectable lectin bound to the surface or with very high staining.

378

379 **REFERENCES**

- 380 1. Hinnebusch BJ, Erickson DL. Yersinia pestis biofilm in the flea vector and its role in the  
381 transmission of plague. Curr Top Microbiol Immunol. 2008;322:229-48. Epub 2008/05/06. doi:  
382 10.1007/978-3-540-75418-3\_11. PubMed PMID: 18453279; PubMed Central PMCID:  
383 PMCPMC3727414.
- 384 2. Zhou D, Yang R. Formation and regulation of Yersinia biofilms. Protein Cell.  
385 2011;2(3):173-9. Epub 2011/03/08. doi: 10.1007/s13238-011-1024-3. PubMed PMID:  
386 21380640; PubMed Central PMCID: PMCPMC4875308.

- 387 3. Hinnebusch BJ, Perry RD, Schwan TG. Role of the *Yersinia pestis* hemin storage (hms)  
388 locus in the transmission of plague by fleas. *Science*. 1996;273(5273):367-70. PubMed PMID:  
389 8662526.
- 390 4. Jarrett CO, Deak E, Isherwood KE, Oyston PC, Fischer ER, Whitney AR, et al.  
391 Transmission of *Yersinia pestis* from an infectious biofilm in the flea vector. *J Infect Dis*.  
392 2004;190(4):783-92. PubMed PMID: 15272407.
- 393 5. Sun YC, Jarrett CO, Bosio CF, Hinnebusch BJ. Retracing the evolutionary path that led  
394 to flea-borne transmission of *Yersinia pestis*. *Cell Host Microbe*. 2014;15(5):578-86. Epub  
395 2014/05/17. doi: 10.1016/j.chom.2014.04.003. PubMed PMID: 24832452; PubMed Central  
396 PMCID: PMC4084870.
- 397 6. Erickson DL, Jarrett CO, Callison JA, Fischer ER, Hinnebusch BJ. Loss of a biofilm-  
398 inhibiting glycosyl hydrolase during the emergence of *Yersinia pestis*. *J Bacteriol*.  
399 2008;190(24):8163-70. Epub 2008/10/22. doi: 10.1128/JB.01181-08. PubMed PMID: 18931111;  
400 PubMed Central PMCID: PMC2593235.
- 401 7. Hinnebusch BJ. The evolution of flea-borne transmission in *Yersinia pestis*. *Curr Issues*  
402 *Mol Biol*. 2005;7(2):197-212. Epub 2005/08/02. PubMed PMID: 16053250.
- 403 8. Wall E, Majdalani N, Gottesman S. The Complex Rcs Regulatory Cascade. *Annual*  
404 *review of microbiology*. 2018;72:111-39. Epub 2018/06/14. doi: 10.1146/annurev-micro-  
405 090817-062640. PubMed PMID: 29897834.
- 406 9. Hussein NA, Cho SH, Laloux G, Siam R, Collet JF. Distinct domains of *Escherichia coli*  
407 IgaA connect envelope stress sensing and down-regulation of the Rcs phosphorelay across  
408 subcellular compartments. *PLoS genetics*. 2018;14(5):e1007398. Epub 2018/06/01. doi:

- 409 10.1371/journal.pgen.1007398. PubMed PMID: 29852010; PubMed Central PMCID:  
410 PMCPMC5978795.
- 411 10. Guo XP, Ren GX, Zhu H, Mao XJ, Sun YC. Differential regulation of the hmsCDE  
412 operon in *Yersinia pestis* and *Yersinia pseudotuberculosis* by the Rcs phosphorelay system.  
413 Scientific reports. 2015;5:8412. Epub 2015/02/13. doi: 10.1038/srep08412. PubMed PMID:  
414 25672461; PubMed Central PMCID: PMCPMC4325325.
- 415 11. Sun YC, Guo XP, Hinnebusch BJ, Darby C. The *Yersinia pestis* Rcs phosphorelay  
416 inhibits biofilm formation by repressing transcription of the diguanylate cyclase gene hmsT. J  
417 Bacteriol. 2012;194(8):2020-6. Epub 2012/02/14. doi: 10.1128/JB.06243-11. PubMed PMID:  
418 22328676; PubMed Central PMCID: PMCPMC3318482.
- 419 12. Fang N, Yang H, Fang H, Liu L, Zhang Y, Wang L, et al. RcsAB is a major repressor of  
420 *Yersinia* biofilm development through directly acting on hmsCDE, hmsT, and hmsHFRS.  
421 Scientific reports. 2015;5:9566. Epub 2015/04/02. doi: 10.1038/srep09566. PubMed PMID:  
422 25828910; PubMed Central PMCID: PMCPMC4381331.
- 423 13. Sun YC, Hinnebusch BJ, Darby C. Experimental evidence for negative selection in the  
424 evolution of a *Yersinia pestis* pseudogene. Proc Natl Acad Sci U S A. 2008;105(23):8097-101.  
425 Epub 2008/06/05. doi: 10.1073/pnas.0803525105. PubMed PMID: 18523005; PubMed Central  
426 PMCID: PMCPMC2430365.
- 427 14. Kirillina O, Fetherston JD, Bobrov AG, Abney J, Perry RD. HmsP, a putative  
428 phosphodiesterase, and HmsT, a putative diguanylate cyclase, control Hms-dependent biofilm  
429 formation in *Yersinia pestis*. Mol Microbiol. 2004;54(1):75-88. Epub 2004/10/02. doi:  
430 10.1111/j.1365-2958.2004.04253.x. PubMed PMID: 15458406.

- 431 15. Ren GX, Yan HQ, Zhu H, Guo XP, Sun YC. HmsC, a periplasmic protein, controls  
432 biofilm formation via repression of HmsD, a diguanylate cyclase in *Yersinia pestis*. *Environ*  
433 *Microbiol.* 2014;16(4):1202-16. Epub 2013/11/07. doi: 10.1111/1462-2920.12323. PubMed  
434 PMID: 24192006.
- 435 16. Bobrov AG, Kirillina O, Forman S, Mack D, Perry RD. Insights into *Yersinia pestis*  
436 biofilm development: topology and co-interaction of Hms inner membrane proteins involved in  
437 exopolysaccharide production. *Environ Microbiol.* 2008;10(6):1419-32. Epub 2008/02/19. doi:  
438 10.1111/j.1462-2920.2007.01554.x. PubMed PMID: 18279344.
- 439 17. Bobrov AG, Kirillina O, Perry RD. Regulation of biofilm formation in *Yersinia pestis*.  
440 *Adv Exp Med Biol.* 2007;603:201-10. Epub 2007/10/31. doi: 10.1007/978-0-387-72124-8\_17.  
441 PubMed PMID: 17966416.
- 442 18. Schachterle JK, Stewart RM, Schachterle MB, Calder JT, Kang H, Prince JT, et al.  
443 *Yersinia pseudotuberculosis* BarA-UvrY Two-Component Regulatory System Represses  
444 Biofilms via CsrB. *Front Cell Infect Microbiol.* 2018;8:323. Epub 2018/10/04. doi:  
445 10.3389/fcimb.2018.00323. PubMed PMID: 30280093; PubMed Central PMCID:  
446 PMC6153318.
- 447 19. Wells TJ, Tree JJ, Ulett GC, Schembri MA. Autotransporter proteins: novel targets at the  
448 bacterial cell surface. *Fems Microbiology Letters.* 2007;274(2):163-72. doi: 10.1111/j.1574-  
449 6968.2007.00833.x. PubMed PMID: WOS:000248960500001.
- 450 20. Linke D, Riess T, Autenrieth IB, Lupas A, Kempf VA. Trimeric autotransporter  
451 adhesins: variable structure, common function. *Trends Microbiol.* 2006;14(6):264-70. Epub  
452 2006/05/09. doi: 10.1016/j.tim.2006.04.005. PubMed PMID: 16678419.

- 453 21. Meuskens I, Saragliadis A, Leo JC, Linke D. Type V Secretion Systems: An Overview of  
454 Passenger Domain Functions. *Front Microbiol.* 2019;10:1163. Epub 2019/06/20. doi:  
455 10.3389/fmicb.2019.01163. PubMed PMID: 31214135; PubMed Central PMCID:  
456 PMCPMC6555100.
- 457 22. Klemm P, Hjerrild L, Gjermansen M, Schembri MA. Structure-function analysis of the  
458 self-recognizing Antigen 43 autotransporter protein from *Escherichia coli*. *Mol Microbiol.*  
459 2004;51(1):283-96. Epub 2003/12/04. doi: 10.1046/j.1365-2958.2003.03833.x. PubMed PMID:  
460 14651628.
- 461 23. Okaro U, Green R, Mohapatra S, Anderson B. The trimeric autotransporter adhesin BadA  
462 is required for in vitro biofilm formation by *Bartonella henselae*. *NPJ Biofilms Microbiomes.*  
463 2019;5:10. Epub 2019/03/20. doi: 10.1038/s41522-019-0083-8. PubMed PMID: 30886729;  
464 PubMed Central PMCID: PMCPMC6418236.
- 465 24. Lazar Adler NR, Dean RE, Saint RJ, Stevens MP, Prior JL, Atkins TP, et al.  
466 Identification of a predicted trimeric autotransporter adhesin required for biofilm formation of  
467 *Burkholderia pseudomallei*. *PLoS ONE.* 2013;8(11):e79461. Epub 2013/11/14. doi:  
468 10.1371/journal.pone.0079461. PubMed PMID: 24223950; PubMed Central PMCID:  
469 PMCPMC3818227.
- 470 25. Nuss AM, Heroven AK, Waldmann B, Reinkensmeier J, Jarek M, Beckstette M, et al.  
471 Transcriptomic profiling of *Yersinia pseudotuberculosis* reveals reprogramming of the Crp  
472 regulon by temperature and uncovers Crp as a master regulator of small RNAs. *PLoS genetics.*  
473 2015;11(3):e1005087. Epub 2015/03/31. doi: 10.1371/journal.pgen.1005087. PubMed PMID:  
474 25816203; PubMed Central PMCID: PMCPMC4376681.

- 475 26. Romeo T, Vakulskas CA, Babitzke P. Post-transcriptional regulation on a global scale:  
476 form and function of Csr/Rsm systems. *Environ Microbiol.* 2013;15(2):313-24. Epub  
477 2012/06/08. doi: 10.1111/j.1462-2920.2012.02794.x. PubMed PMID: 22672726; PubMed  
478 Central PMCID: PMC3443267.
- 479 27. Heroven AK, Bohme K, Rohde M, Dersch P. A Csr-type regulatory system, including  
480 small non-coding RNAs, regulates the global virulence regulator RovA of *Yersinia*  
481 *pseudotuberculosis* through RovM. *Mol Microbiol.* 2008;68(5):1179-95. Epub 2008/04/24. doi:  
482 10.1111/j.1365-2958.2008.06218.x. PubMed PMID: 18430141.
- 483 28. Cano DA, Dominguez-Bernal G, Tierrez A, Garcia-Del Portillo F, Casadesus J.  
484 Regulation of capsule synthesis and cell motility in *Salmonella enterica* by the essential gene  
485 *igaA*. *Genetics.* 2002;162(4):1513-23. Epub 2003/01/14. PubMed PMID: 12524328; PubMed  
486 Central PMCID: PMC1462382.
- 487 29. Cho SH, Szewczyk J, Pesavento C, Zietek M, Banzhaf M, Roszczenko P, et al. Detecting  
488 envelope stress by monitoring beta-barrel assembly. *Cell.* 2014;159(7):1652-64. Epub  
489 2014/12/20. doi: 10.1016/j.cell.2014.11.045. PubMed PMID: 25525882.
- 490 30. Palace SG, Proulx MK, Lu S, Baker RE, Goguen JD. Genome-wide mutant fitness  
491 profiling identifies nutritional requirements for optimal growth of *Yersinia pestis* in deep tissue.  
492 *mBio.* 2014;5(4). Epub 2014/08/21. doi: 10.1128/mBio.01385-14. PubMed PMID: 25139902;  
493 PubMed Central PMCID: PMC4147864.
- 494 31. Senior NJ, Sasidharan K, Saint RJ, Scott AE, Sarkar-Tyson M, Ireland PM, et al. An  
495 integrated computational-experimental approach reveals *Yersinia pestis* genes essential across a  
496 narrow or a broad range of environmental conditions. *BMC Microbiol.* 2017;17(1):163. Epub

- 497 2017/07/25. doi: 10.1186/s12866-017-1073-8. PubMed PMID: 28732479; PubMed Central  
498 PMCID: PMC5521123.
- 499 32. Erickson DL, Waterfield NR, Vadyvaloo V, Long D, Fischer ER, Ffrench-Constant R, et  
500 al. Acute oral toxicity of *Yersinia pseudotuberculosis* to fleas: implications for the evolution of  
501 vector-borne transmission of plague. *Cell Microbiol.* 2007;9(11):2658-66. Epub 2007/06/26. doi:  
502 10.1111/j.1462-5822.2007.00986.x. PubMed PMID: 17587333.
- 503 33. Erickson DL, Jarrett CO, Wren BW, Hinnebusch BJ. Serotype differences and lack of  
504 biofilm formation characterize *Yersinia pseudotuberculosis* infection of the *Xenopsylla cheopis*  
505 flea vector of *Yersinia pestis*. *J Bacteriol.* 2006;188(3):1113-9. Epub 2006/01/24. doi:  
506 10.1128/JB.188.3.1113-1119.2006. PubMed PMID: 16428415; PubMed Central PMCID:  
507 PMCPMC1347331.
- 508 34. Darby C, Hsu JW, Ghori N, Falkow S. *Caenorhabditis elegans*: plague bacteria biofilm  
509 blocks food intake. *Nature.* 2002;417(6886):243-4. PubMed PMID: 12015591.
- 510 35. Joshua GW, Karlyshev AV, Smith MP, Isherwood KE, Titball RW, Wren BW. A  
511 *Caenorhabditis elegans* model of *Yersinia* infection: biofilm formation on a biotic surface.  
512 *Microbiology.* 2003;149(Pt 11):3221-9. PubMed PMID: 14600234.
- 513 36. Atkinson S, Goldstone RJ, Joshua GW, Chang CY, Patrick HL, Camara M, et al. Biofilm  
514 development on *Caenorhabditis elegans* by *Yersinia* is facilitated by quorum sensing-dependent  
515 repression of type III secretion. *PLoS Pathog.* 2011;7(1):e1001250. Epub 2011/01/22. doi:  
516 10.1371/journal.ppat.1001250. PubMed PMID: 21253572; PubMed Central PMCID:  
517 PMCPMC3017118.



- 518 37. Chauhan N, Wrobel A, Skurnik M, Leo JC. Yersinia adhesins: An arsenal for infection.  
519 Proteomics Clin Appl. 2016;10(9-10):949-63. Epub 2016/04/14. doi: 10.1002/prca.201600012.  
520 PubMed PMID: 27068449.
- 521 38. Nair MK, De Masi L, Yue M, Galvan EM, Chen H, Wang F, et al. Adhesive properties of  
522 YapV and paralogous autotransporter proteins of Yersinia pestis. Infect Immun.  
523 2015;83(5):1809-19. Epub 2015/02/19. doi: 10.1128/IAI.00094-15. PubMed PMID: 25690102;  
524 PubMed Central PMCID: PMC4399037.
- 525 39. Lawrenz MB, Pennington J, Miller VL. Acquisition of omptin reveals cryptic virulence  
526 function of autotransporter YapE in Yersinia pestis. Mol Microbiol. 2013;89(2):276-87. Epub  
527 2013/05/25. doi: 10.1111/mmi.12273. PubMed PMID: 23701256; PubMed Central PMCID:  
528 PMCPMC3708302.
- 529 40. Lenz JD, Lawrenz MB, Cotter DG, Lane MC, Gonzalez RJ, Palacios M, et al. Expression  
530 during host infection and localization of Yersinia pestis autotransporter proteins. J Bacteriol.  
531 2011;193(21):5936-49. Epub 2011/08/30. doi: 10.1128/JB.05877-11. PubMed PMID: 21873491;  
532 PubMed Central PMCID: PMC3194903.
- 533 41. Felek S, Lawrenz MB, Krukoni ES. The Yersinia pestis autotransporter YapC mediates  
534 host cell binding, autoaggregation and biofilm formation. Microbiology. 2008;154(Pt 6):1802-  
535 12. Epub 2008/06/06. doi: 154/6/1802 [pii]  
536 10.1099/mic.0.2007/010918-0. PubMed PMID: 18524935.
- 537 42. El Tahir Y, Skurnik M. YadA, the multifaceted Yersinia adhesin. Int J Med Microbiol.  
538 2001;291(3):209-18. Epub 2001/09/14. doi: 10.1078/1438-4221-00119. PubMed PMID:  
539 11554561.

- 540 43. Rosqvist R, Skurnik M, Wolf-Watz H. Increased virulence of *Yersinia*  
541 pseudotuberculosis by two independent mutations. *Nature*. 1988;334(6182):522-4. Epub  
542 1988/08/11. doi: 10.1038/334522a0. PubMed PMID: 3043229.
- 543 44. Uittenbogaard AM, Myers-Morales T, Gorman AA, Welsh E, Wulff C, Hinnebusch BJ,  
544 et al. Temperature-dependence of yadBC phenotypes in *Yersinia pestis*. *Microbiology*.  
545 2014;160(Pt 2):396-405. Epub 2013/11/14. doi: 10.1099/mic.0.073205-0. PubMed PMID:  
546 24222617; PubMed Central PMCID: PMC3919538.
- 547 45. Martinez-Chavarria LC, Vadyvaloo V. *Yersinia pestis* and *Yersinia pseudotuberculosis*  
548 infection: a regulatory RNA perspective. *Front Microbiol*. 2015;6:956. Epub 2015/10/07. doi:  
549 10.3389/fmicb.2015.00956. PubMed PMID: 26441890; PubMed Central PMCID:  
550 PMC4585118.
- 551 46. O'Gara JP. *ica* and beyond: biofilm mechanisms and regulation in *Staphylococcus*  
552 *epidermidis* and *Staphylococcus aureus*. *FEMS Microbiol Lett*. 2007;270(2):179-88. Epub  
553 2007/04/11. doi: 10.1111/j.1574-6968.2007.00688.x. PubMed PMID: 17419768.
- 554 47. O'Neill E, Pozzi C, Houston P, Humphreys H, Robinson DA, Loughman A, et al. A novel  
555 *Staphylococcus aureus* biofilm phenotype mediated by the fibronectin-binding proteins, FnBPA  
556 and FnBPB. *J Bacteriol*. 2008;190(11):3835-50. Epub 2008/04/01. doi: 10.1128/JB.00167-08.  
557 PubMed PMID: 18375547; PubMed Central PMCID: PMC2395027.
- 558 48. Schaeffer CR, Hoang TN, Sudbeck CM, Alawi M, Tolo IE, Robinson DA, et al.  
559 Versatility of Biofilm Matrix Molecules in *Staphylococcus epidermidis* Clinical Isolates and  
560 Importance of Polysaccharide Intercellular Adhesin Expression during High Shear Stress.  
561 *mSphere*. 2016;1(5). Epub 2016/10/18. doi: 10.1128/mSphere.00165-16. PubMed PMID:  
562 27747298; PubMed Central PMCID: PMC5064449.

- 563 49. Yu L, Hisatsune J, Hayashi I, Tatsukawa N, Sato'o Y, Mizumachi E, et al. A Novel  
564 Repressor of the *ica* Locus Discovered in Clinically Isolated Super-Biofilm-Elaborating  
565 *Staphylococcus aureus*. *mBio*. 2017;8(1). Epub 2017/02/02. doi: 10.1128/mBio.02282-16.  
566 PubMed PMID: 28143981; PubMed Central PMCID: PMC5285506.
- 567 50. Zapotoczna M, O'Neill E, O'Gara JP. Untangling the Diverse and Redundant  
568 Mechanisms of *Staphylococcus aureus* Biofilm Formation. *PLoS Pathog*. 2016;12(7):e1005671.  
569 Epub 2016/07/22. doi: 10.1371/journal.ppat.1005671. PubMed PMID: 27442433; PubMed  
570 Central PMCID: PMC4956047.
- 571 51. Vadyvaloo V, Jarrett C, Sturdevant DE, Sebbane F, Hinnebusch BJ. Transit through the  
572 flea vector induces a pretransmission innate immunity resistance phenotype in *Yersinia pestis*.  
573 *PLoS Pathog*. 2010;6(2):e1000783. Epub 2010/03/03. doi: 10.1371/journal.ppat.1000783.  
574 PubMed PMID: 20195507; PubMed Central PMCID: PMC2829055.
- 575 52. Chouikha I, Sturdevant DE, Jarrett C, Sun YC, Hinnebusch BJ. Differential Gene  
576 Expression Patterns of *Yersinia pestis* and *Yersinia pseudotuberculosis* during Infection and  
577 Biofilm Formation in the Flea Digestive Tract. *mSystems*. 2019;4(1). Epub 2019/02/26. doi:  
578 10.1128/mSystems.00217-18. PubMed PMID: 30801031; PubMed Central PMCID:  
579 PMC6381227.
- 580 53. Szczesny M, Beloin C, Ghigo JM. Increased Osmolarity in Biofilm Triggers RcsB-  
581 Dependent Lipid A Palmitoylation in *Escherichia coli*. *mBio*. 2018;9(4). Epub 2018/08/23. doi:  
582 10.1128/mBio.01415-18. PubMed PMID: 30131361; PubMed Central PMCID:  
583 PMC6106083.
- 584 54. Klein G, Stupak A, Biernacka D, Wojtkiewicz P, Lindner B, Raina S. Multiple  
585 Transcriptional Factors Regulate Transcription of the *rpoE* Gene in *Escherichia coli* under

586 Different Growth Conditions and When the Lipopolysaccharide Biosynthesis Is Defective. *J Biol*  
587 *Chem.* 2016;291(44):22999-3019. Epub 2016/10/30. doi: 10.1074/jbc.M116.748954. PubMed  
588 PMID: 27629414; PubMed Central PMCID: PMC5087721.

589 55. You C, Zhang YH. Simple cloning and DNA assembly in *Escherichia coli* by prolonged  
590 overlap extension PCR. *Methods Mol Biol.* 2014;1116:183-92. Epub 2014/01/08. doi:  
591 10.1007/978-1-62703-764-8\_13. PubMed PMID: 24395365.

592 56. Edwards RA, Keller LH, Schifferli DM. Improved allelic exchange vectors and their use  
593 to analyze 987P fimbria gene expression. *Gene.* 1998;207(2):149-57. doi: 10.1016/s0378-  
594 1119(97)00619-7. PubMed PMID: WOS:000072270400007.

595 57. Hashimoto-Gotoh T, Franklin FC, Nordheim A, Timmis KN. Specific-purpose plasmid  
596 cloning vectors. I. Low copy number, temperature-sensitive, mobilization-defective pSC101-  
597 derived containment vectors. *Gene.* 1981;16(1-3):227-35. Epub 1981/12/01. doi: 10.1016/0378-  
598 1119(81)90079-2. PubMed PMID: 6282694.

599 58. Ferrieres L, Hemery G, Nham T, Guerout AM, Mazel D, Beloin C, et al. Silent mischief:  
600 bacteriophage Mu insertions contaminate products of *Escherichia coli* random mutagenesis  
601 performed using suicidal transposon delivery plasmids mobilized by broad-host-range RP4  
602 conjugative machinery. *J Bacteriol.* 2010;192(24):6418-27. doi: 10.1128/JB.00621-10. PubMed  
603 PMID: 20935093; PubMed Central PMCID: PMC3008518.

604 59. Shivak DJ, MacKenzie KD, Watson NL, Pasternak JA, Jones BD, Wang YJ, et al. A  
605 Modular, Tn7-Based System for Making Bioluminescent or Fluorescent *Salmonella* and  
606 *Escherichia coli* Strains. *Appl Environ Microbiol.* 2016;82(16):4931-43. doi:  
607 10.1128/Aem.01346-16. PubMed PMID: WOS:000380550900008.

- 608 60. Erickson DL, Lew CS, Kartchner B, Porter NT, McDaniel SW, Jones NM, et al.  
609 Lipopolysaccharide Biosynthesis Genes of *Yersinia pseudotuberculosis* Promote Resistance to  
610 Antimicrobial Chemokines. PLoS ONE. 2016;11(6):e0157092. doi:  
611 10.1371/journal.pone.0157092. PubMed PMID: 27275606; PubMed Central PMCID:  
612 PMC4898787.
- 613 61. Bassler J, Hernandez Alvarez B, Hartmann MD, Lupas AN. A domain dictionary of  
614 trimeric autotransporter adhesins. Int J Med Microbiol. 2015;305(2):265-75. Epub 2015/01/15.  
615 doi: 10.1016/j.ijmm.2014.12.010. PubMed PMID: 25583454.

616

617 **Supplementary Table 1. Tn5 insertion mutants with increased *yadE::gfp* expression**

| <b>Tn5 Insertion point (orientation)</b> | <b>Mean fluorescence</b> | <b>YPTB gene number</b> | <b>Annotation</b>                        |
|------------------------------------------|--------------------------|-------------------------|------------------------------------------|
| Wild type IP32953                        | 1352                     |                         |                                          |
| 70558 (-)                                | 1744                     | YPTB0058                | <i>yibQ</i> hypothetical protein         |
| 224414 (+)                               | 3395                     | YPTB0185                | <i>cyaA</i> adenylate cyclase            |
| 223538 (+)                               | 3104                     | YPTB0185                | <i>cyaA</i>                              |
| 757367 (-)                               | 5851                     | intergenic              | Near Ysr105                              |
| 757452 (-)                               | 3965                     | intergenic              | Near Ysr105                              |
| 757520 (+)                               | 3791                     | Intergenic              | Near Ysr105                              |
| 757978 (-)                               | 4206                     | Intergenic              | Near Ysr105                              |
| 1732316 (-)                              | 7024                     | YPTB1440                | Hypothetical protein                     |
| 2242048 (-)                              | 12513                    | pseudogene              | transposase (non-functional)             |
| 2475581 (-)                              | 4932                     | intergenic              | Upstream of <i>hns</i>                   |
| 3138894 (+)                              | 1658                     | intergenic              | T6SS island                              |
| 4176313 (-)                              | 13980                    | YPTB3506                | <i>sspA</i> stringent starvation protein |
| 4176973 (-)                              | 11465                    | YPTB3506                | <i>sspA</i> stringent starvation protein |
| 4176992 (+)                              | 9682                     | YPTB3506                | <i>sspA</i> stringent starvation protein |
| 4459942 (+)                              | 9948                     | YPTB3758                | <i>igaA</i> prevents activation of RcsC  |
| 4459955 (+)                              | 8919                     | YPTB3758                | <i>igaA</i> prevents activation of RcsC  |
| 4459959 (-)                              | 11687                    | YPTB3758                | <i>igaA</i> prevents activation of RcsC  |
| 4459976 (-)                              | 9543                     | YPTB3758                | <i>igaA</i> prevents activation of RcsC  |
| 4460097 (+)                              | 9138                     | YPTB3758                | <i>igaA</i> prevents activation of RcsC  |
| 4460363 (-)                              | 10221                    | YPTB3758                | <i>igaA</i> prevents activation of RcsC  |
| 4460771 (+)                              | 10589                    | YPTB3758                | <i>igaA</i> prevents activation of RcsC  |
| 4460832 (+)                              | 8849                     | YPTB3758                | <i>igaA</i> prevents activation of RcsC  |
| 4461288 (+)                              | 9740                     | YPTB3758                | <i>igaA</i> prevents activation of RcsC  |

618

619

620 **Supplementary Table 2. PCR Primers**

| Primer     | Sequence (5' – 3')*                                 | Purpose                                                       |
|------------|-----------------------------------------------------|---------------------------------------------------------------|
| 2394-F     | GCAGTCAGGCACCGTGTATGGGGATGGTATGAAAAGTATCC           | Amplify <i>yadE</i> to create pACYC- <i>yadE</i>              |
| 2394-R     | CCATTCAGGTTCGAGGTGGCCCAATATTCAGTGTGGCCTTTC          |                                                               |
| pACYCa     | GGCCACCTCGACCTGAATGG                                | pACYC184 vector primers                                       |
| pACYCb     | CATACACGGTGCCTGACTGC                                |                                                               |
| 2394A      | GGTTTCATCGACCTCCACCGGGTGGGGTCAGTGGGTAATG            | 5' portion of <i>yadE</i> for plasmid pREΔ <i>yadE</i>        |
| 2394B      | GGCAAATGGCTAACCGTATTCCCAATATTCAGTGTGGCCTTTC         |                                                               |
| 2394C      | CATTACCCACTGACCCACCCGGTGGAGGTCGATGAAACC             | 3' portion of <i>yadE</i> for plasmid pREΔ <i>yadE</i>        |
| 2394D      | CCTTAAACGCCTGGTTGCTACGGGGATGGTATGAAAAGTATCC         |                                                               |
| pRE112a    | GAAAGGCCAACACTGAATATTGGGAATACGGTTAGCCATTGCC         | pRE112 vector primers                                         |
| pRE112b    | GGATACTTTTCATACCATCCCCGTAGCAACCAGGCGTTAAGG          |                                                               |
| ampR F     | CATTACCCACTGACCCACCCCTTAGACGTCAGGTGGCACTT           | Amplify <i>bla</i> from pHSG415                               |
| ampR R     | GGTTTCATCGACCTCCACCGGTAACCTTGGTCTGACAGTTACCAATG     |                                                               |
| pRE112c    | AAGTGCCACCTGACGTCTAAGGGTGGGGTCAGTGGGTAATG           | Inserting <i>bla</i> to create pREΔ <i>yadE</i> :: <i>bla</i> |
| pRE112d    | CATTGGTAACTGTCAGACCAAGTTTACCGGTGGAGGTCGATGAAAC<br>C |                                                               |
| 2394 int F | GACCGCTGTTGTTGTTCCACC                               | <i>yadE</i> internal primers to verify deletion               |
| 2394 int R | GGAGCACAGTCTCTGGCATT                                |                                                               |
| 2394 proF  | CTGAAGTCAGCCCCATACGAAATATATTTTTCTACCGCT             | <i>yadE</i> promoter for pACYC <i>yadE</i> :: <i>gfp</i>      |
| 2394 proR  | TCTTCTCCTTTACGCATACCATCCCCATT                       |                                                               |
| GFP F      | GGTGAACAAGAATAAAAATGGGGATGGTATGCGTAAAGGAGAAGAAC     | <i>gfp</i> from                                               |

|           |                                                   |                                                           |
|-----------|---------------------------------------------------|-----------------------------------------------------------|
| GFP R     | <i>GTTCAGGGCAGGGTCGTTAATTATTTGTATAGTTCATCCATG</i> | pUC18R6K-<br>miniTn7T                                     |
| pACYCc    | TCTTCTCCTTTACGCATACCATCCCCATTTTATTCTTGTC          | pACYC <i>yadE::gfp</i>                                    |
| pACYCd    | CATGGATGAACTATACAAATAATTAACGACCCTGCCCTGAAC        |                                                           |
| igaA F    | GCAACGTCAAGGACAAAGGG                              | pJET- <i>igaA</i>                                         |
| igaA R    | TGAGCGATGATCAACCGGAG                              |                                                           |
| rcsB F    | TCGGCAAGCAGCTATGTGAA                              | pJET- <i>rcsB</i>                                         |
| rcsB R    | GATACTCTGCGCCAGATGCT                              |                                                           |
| Arb1      | GGCCACGCGTCGACTAGTACNNNNNNNNNGATAT                | Arbitrary PCR<br>and sequencing of<br>Tn5 insertion sites |
| Arb2      | GGCCACGCGTCGACTAGTAC                              |                                                           |
| extsx     | GACAACAAGCCAGGGATG                                |                                                           |
| intsx     | CGCACTGAGAAGCCCTTAGAGC                            |                                                           |
| kanarb3   | TGACACAGGAACACTTAACGGCTGAC                        |                                                           |
| tpnRL13-2 | CAGCAACACCTTCTTCACGA                              |                                                           |
| intdx     | GAGTCGACCTGCAGGCATGC                              |                                                           |
| kanarb2   | GCATGCAAGCTTCAGGGTTGAG                            |                                                           |

621 \* Italicized portion of primers denote target binding region where applicable, and non-italicized portion is  
622 complementary to vector sequence for overlapping PCR.



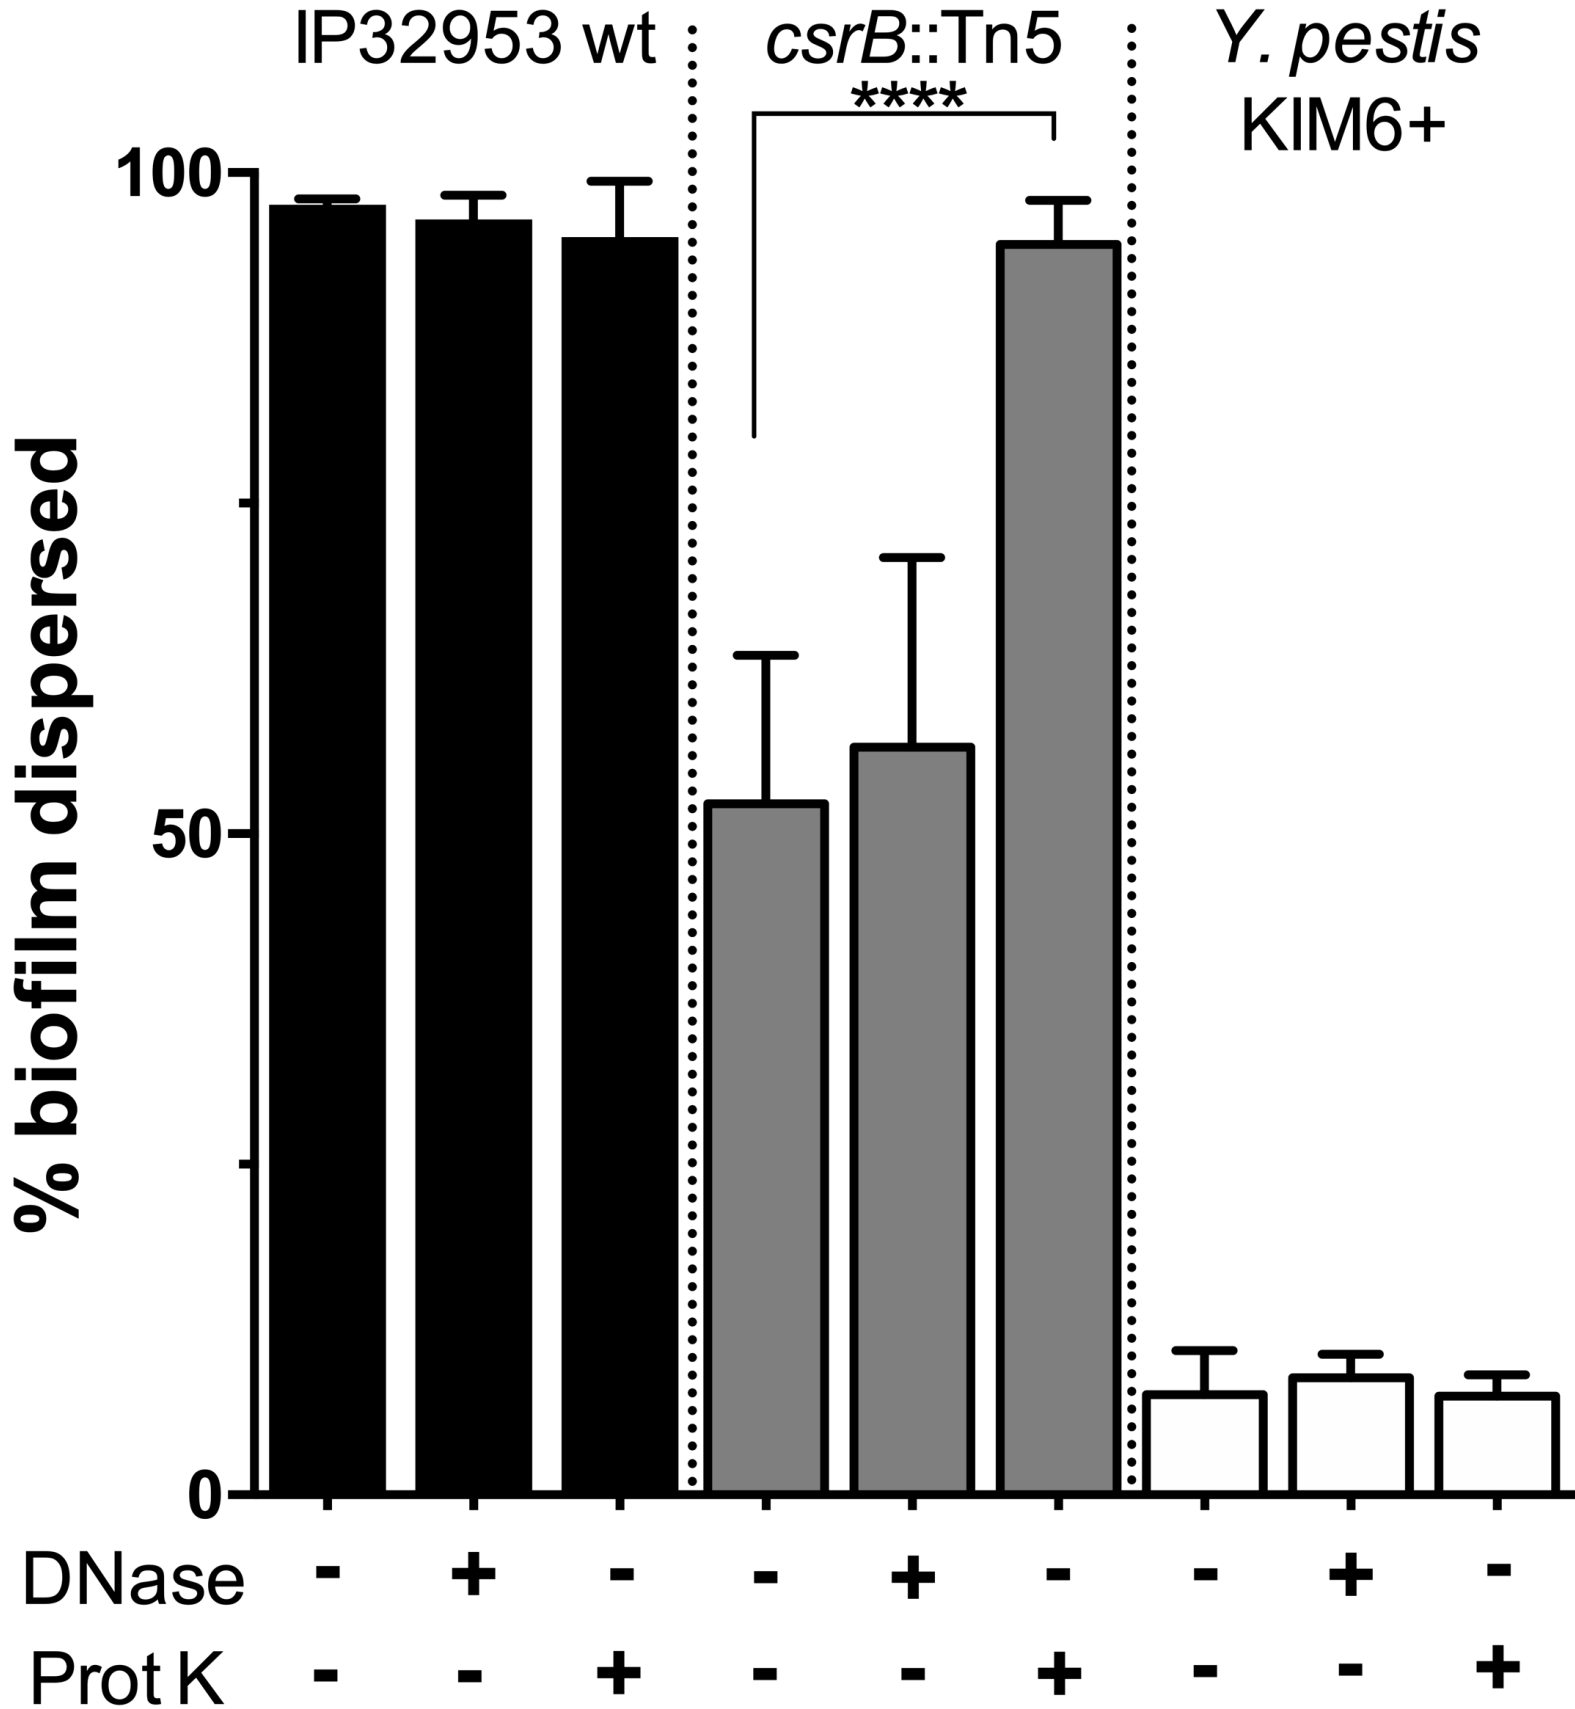

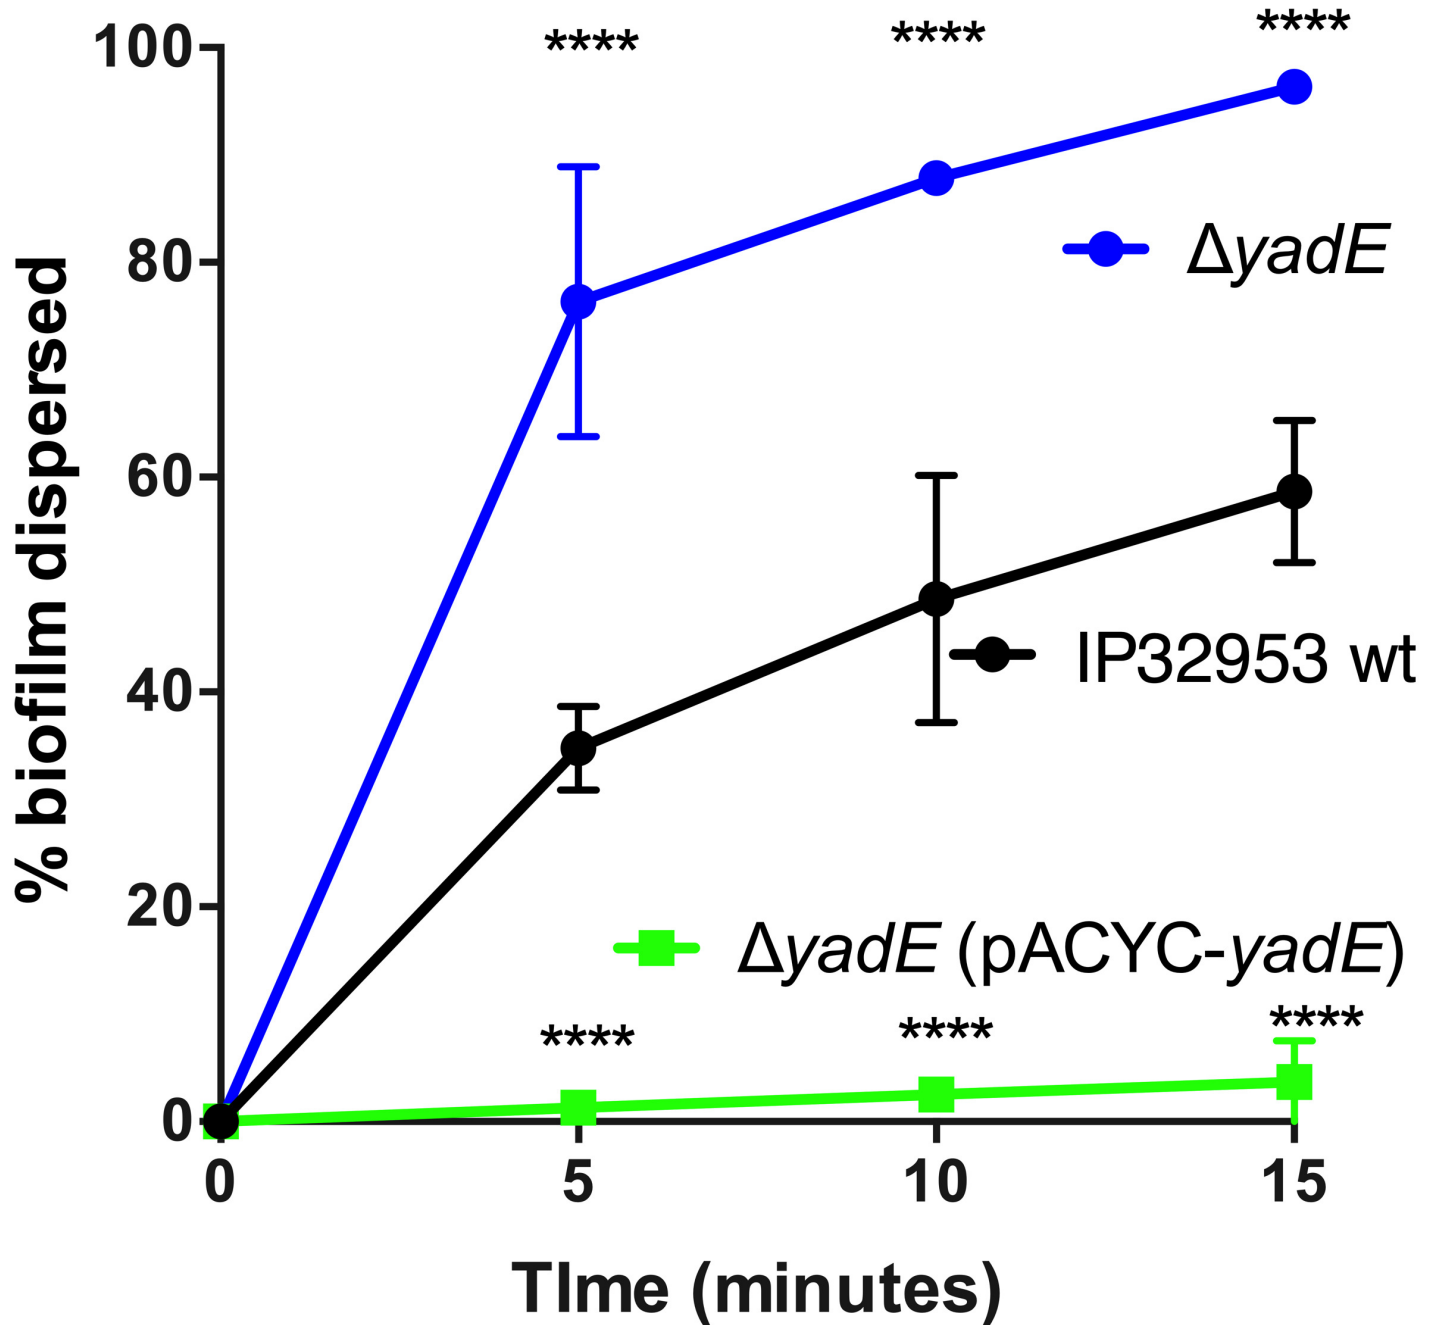

# *yadE::gfp*

Mean FITC-A

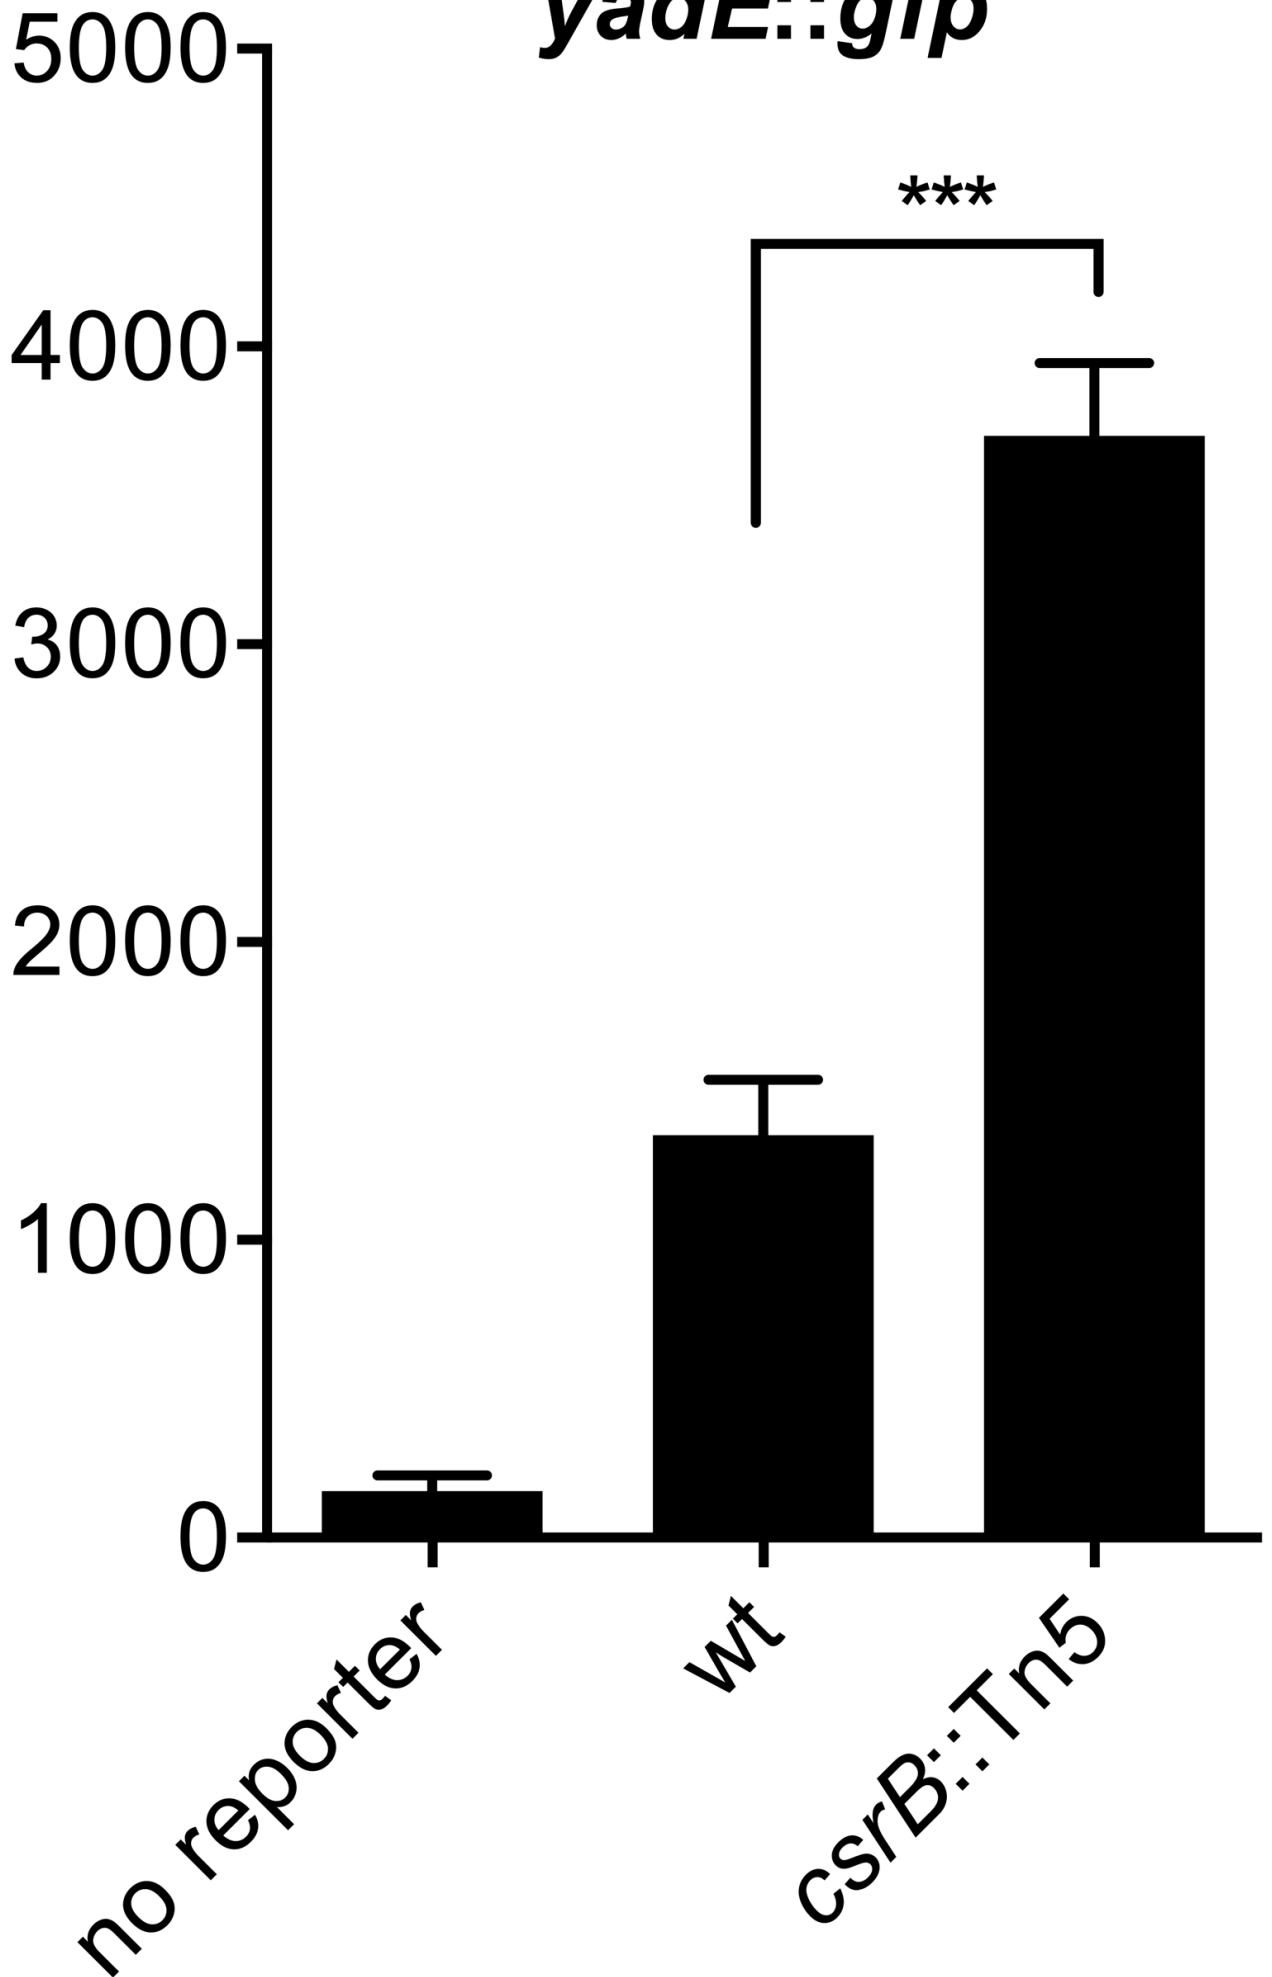

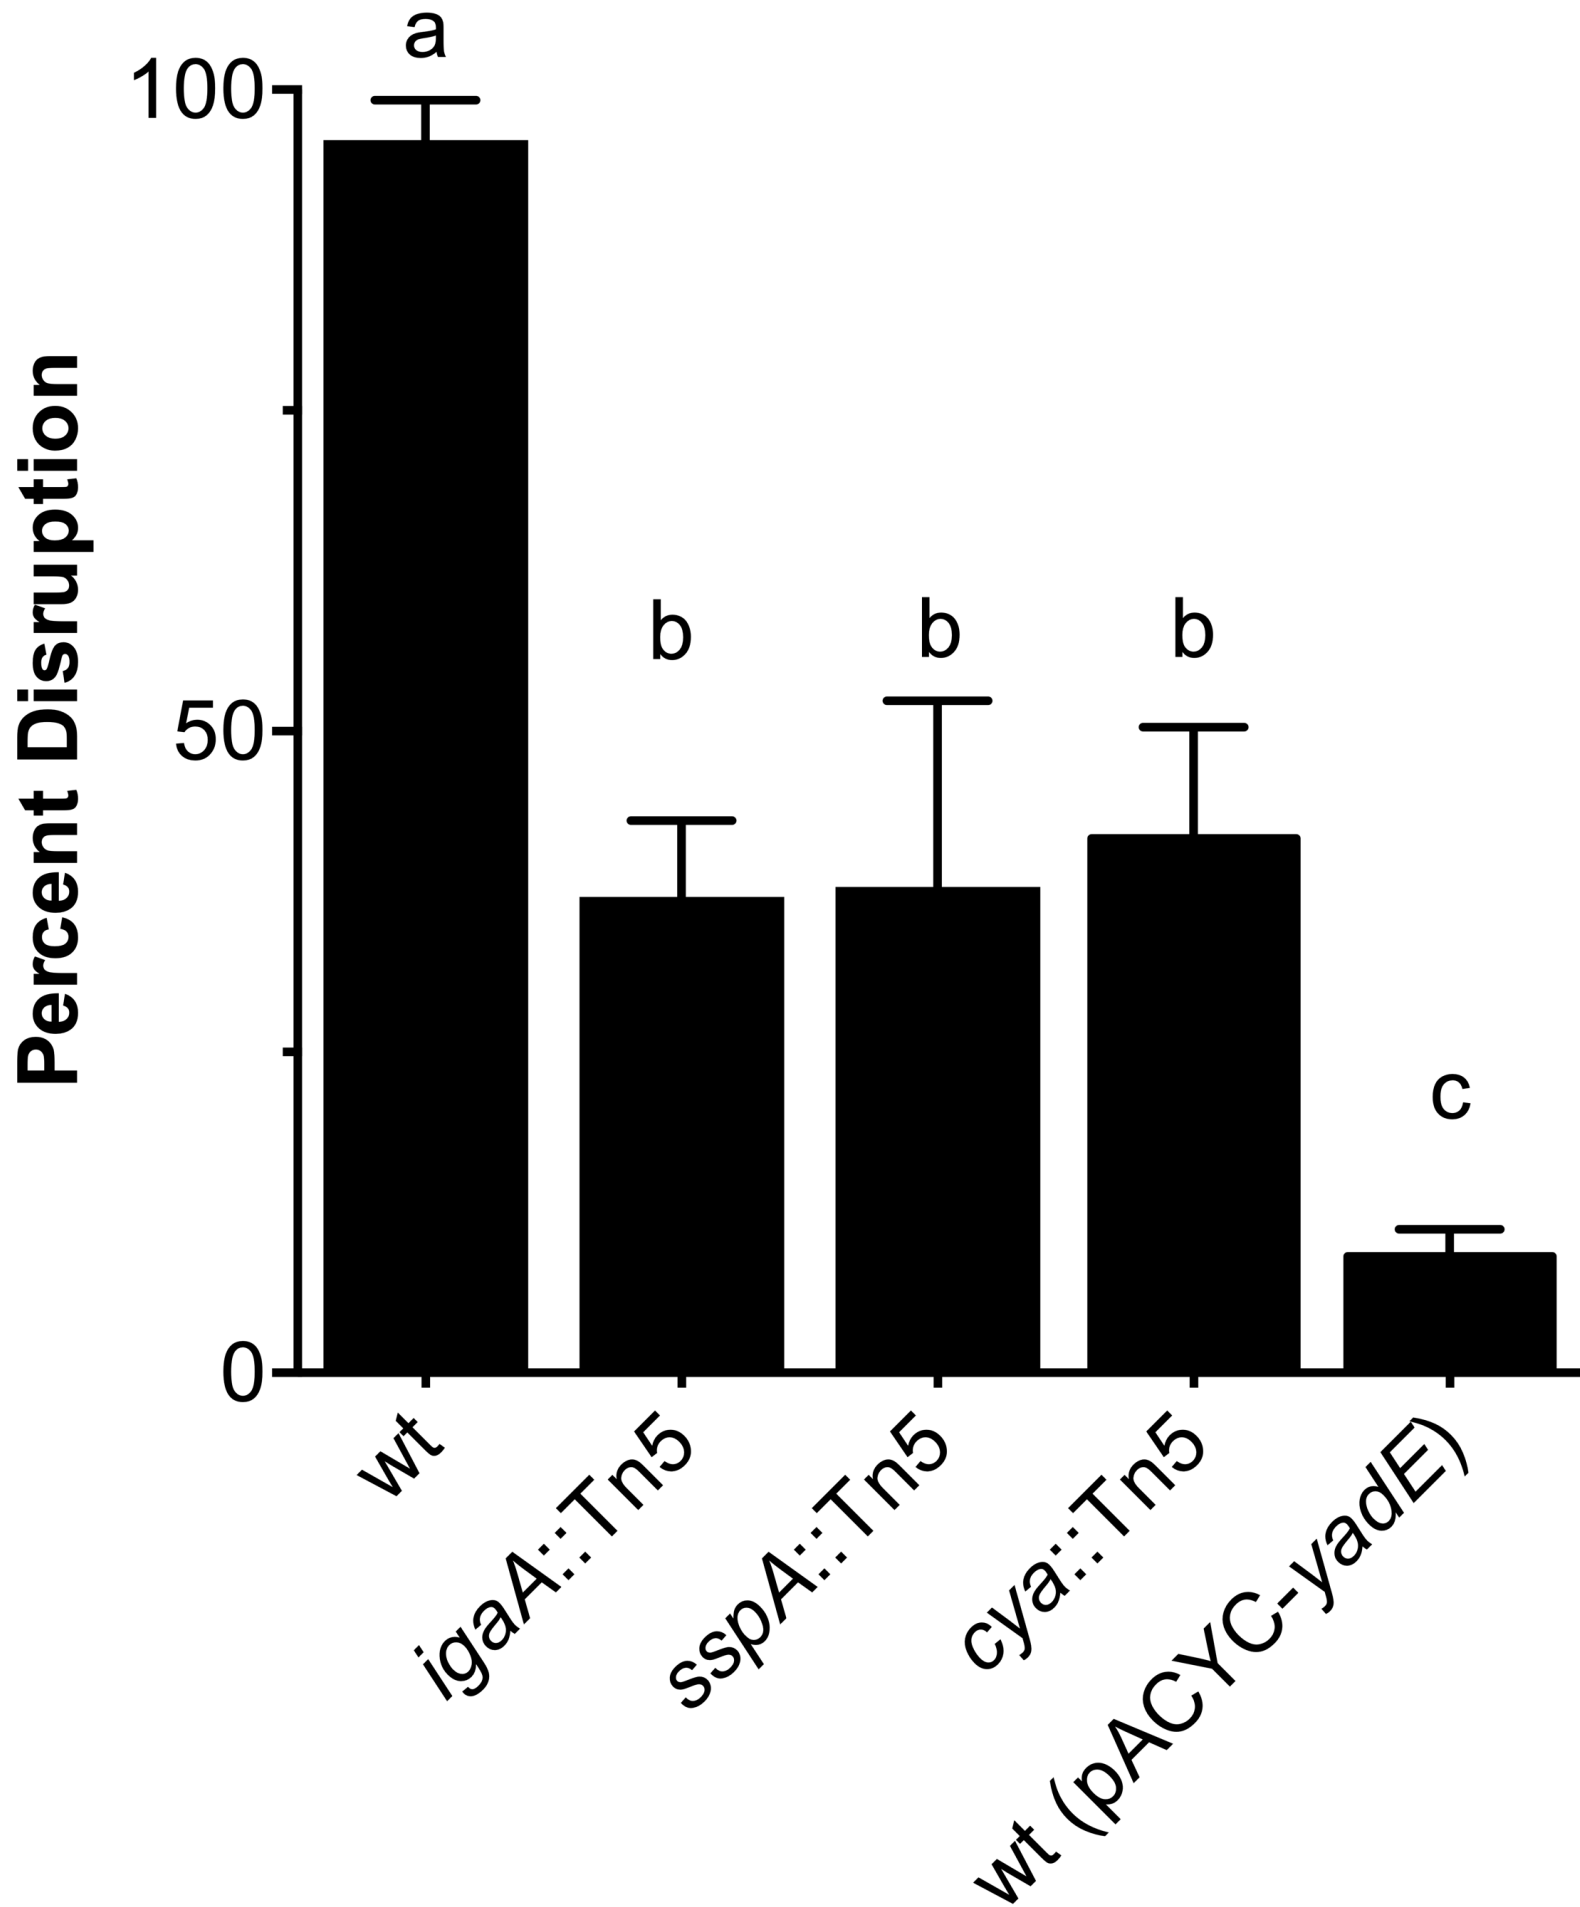

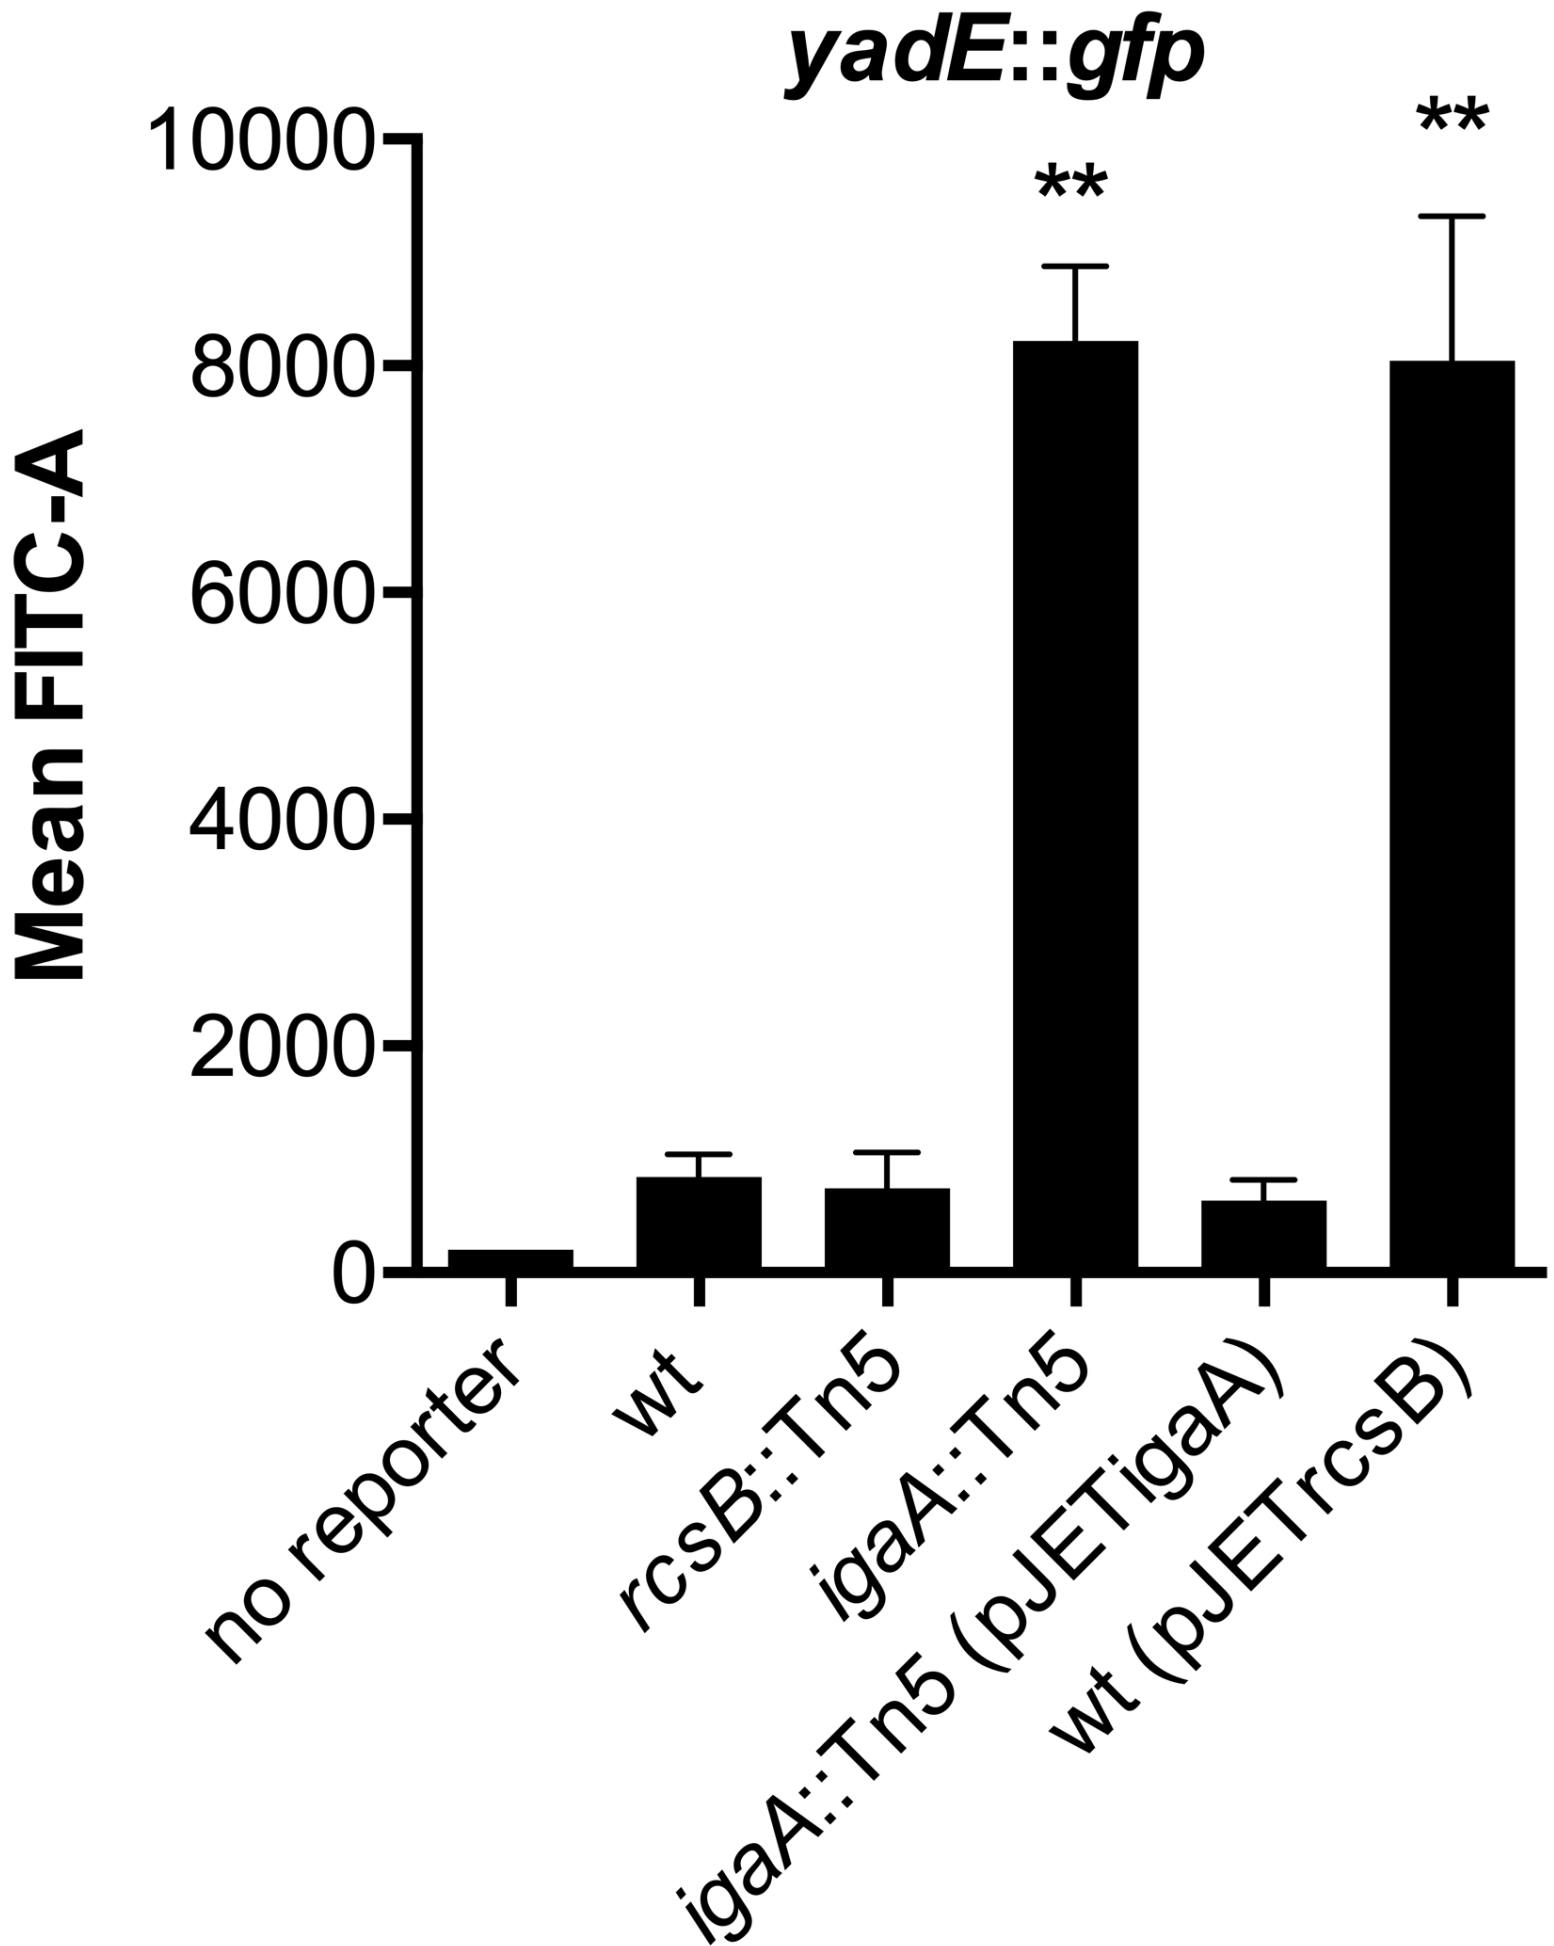

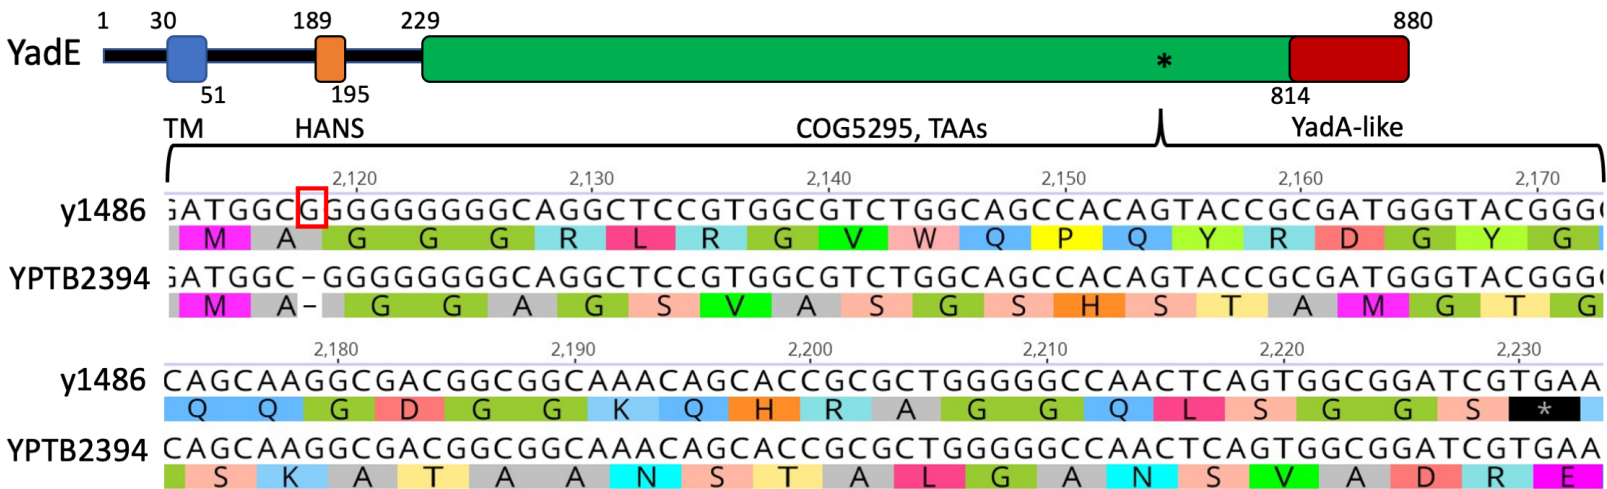

A

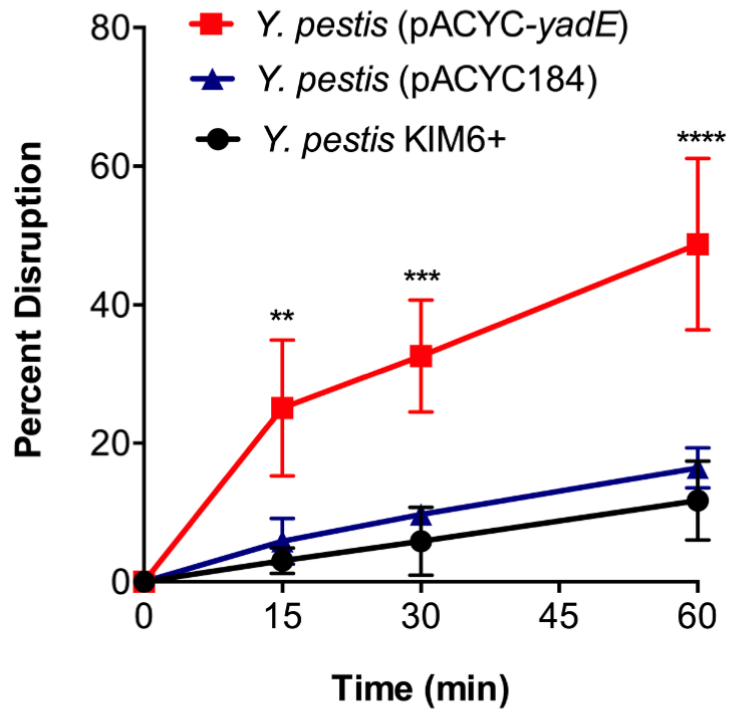

B

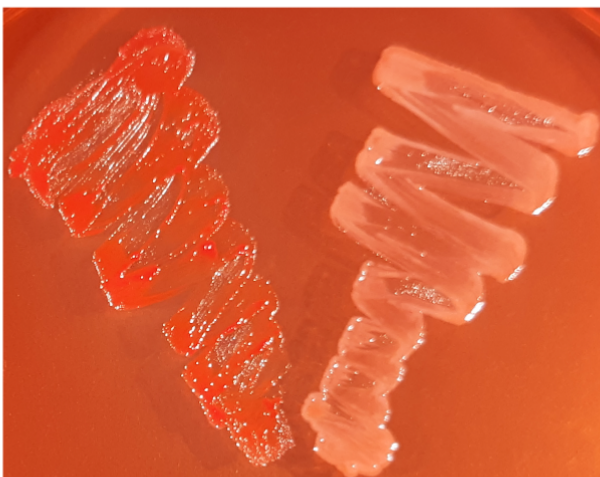

pACYC184 pACYC-yadE

C

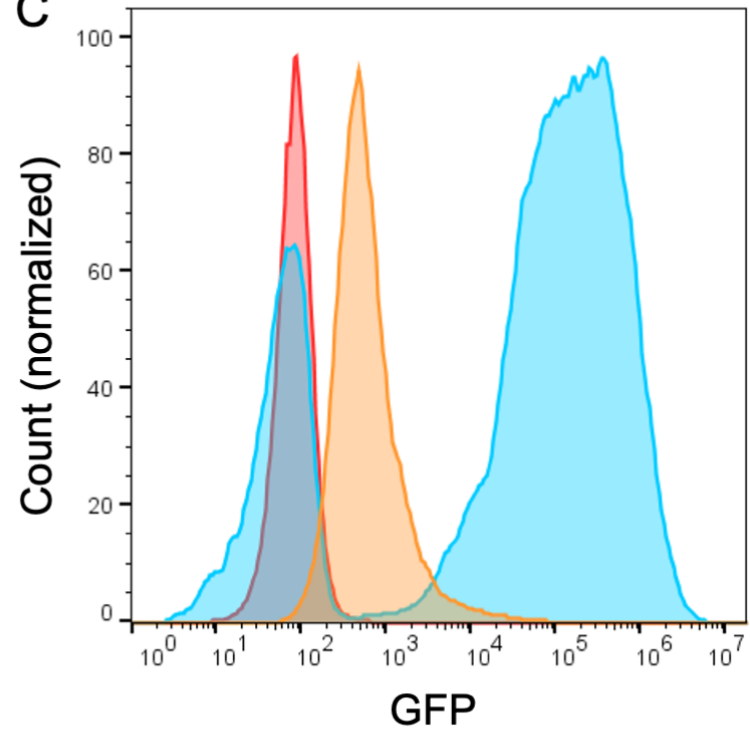

Source: http://biorxiv.org/content/10.1101/2020.03.31.019323v1.full.pdf
